# Supplementary material
Source: PubMed Central journal article supplement (PMC4137862)
Supplement: NIHMS620865-supplement-Table_S1.pdf [file NIHMS620865-supplement-Table_S1.pdf]

Supplementary Information for:

## **Virtual Screening of Integrase Inhibitors by Large Scale Binding Free Energy Calculations: the SAMPL4 Challenge**

Emilio Gallicchio Nanjie Deng, Peng He, Lauren Wickstrom, Alexander L. Perryman, Daniel N. Santiago, Stefano Forli, Arthur J. Olson, and Ronald M. Levy

**Table S1** (next page): Chemical structures of the 451 ligand models investigated ranked by binding free energy score (“FE”). Those lacking binding free energy estimates are listed last. “Title”: assigned ligand id. “DGb”: BEDAM binding free energy and “dDGb” uncertainty. “IP”: ionization free energy penalty. “FE”: free energy score (sum of binding free energy and ionization penalty). “DEb”: binding energy. “Dgr”: reorganization free energy. A confirmed LEDGF binder has a label of “1”, “None” denotes a non-binder. Energy values in kcal/mol.

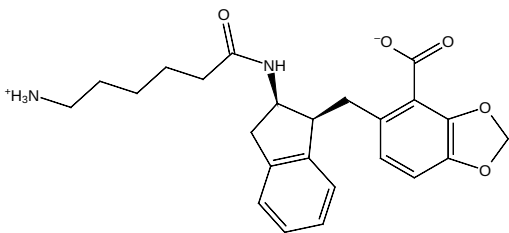

title: AVX17557\_3  
FE: -8.9  
DGb: -8.9  
dDGb: 0.44  
DEb: -51.6  
DGr: 42.7  
IP: 0.0  
LEDGF Binder: 1

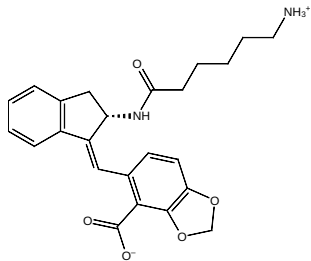

title: AVX101124\_0  
FE: -8.4  
DGb: -8.4  
dDGb: 0.09  
DEb: -50.1  
DGr: 41.7  
IP: 0.0  
LEDGF Binder: None

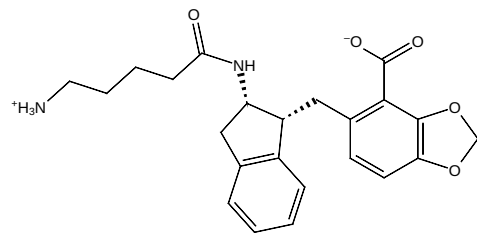

title: AVX17556\_3  
FE: -8.2  
DGb: -8.2  
dDGb: 0.76  
DEb: -47.1  
DGr: 38.9  
IP: 0.0  
LEDGF Binder: 1

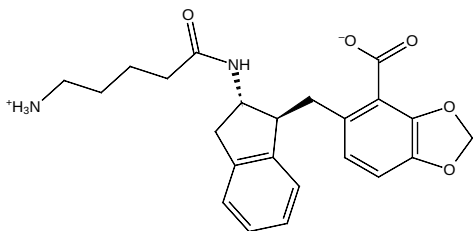

title: AVX17556\_1  
FE: -7.9  
DGb: -7.9  
dDGb: 0.03  
DEb: -46.0  
DGr: 38.1  
IP: 0.0  
LEDGF Binder: None

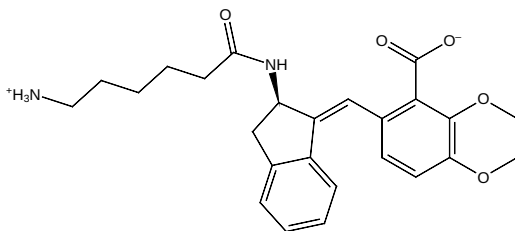

title: AVX101133\_0  
FE: -7.5  
DGb: -7.5  
dDGb: 0.73  
DEb: -46.8  
DGr: 39.3  
IP: 0.0  
LEDGF Binder: None

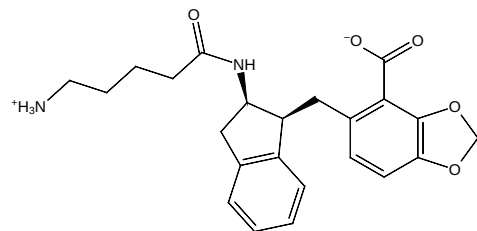

title: AVX17556\_0  
FE: -7.4  
DGb: -7.4  
dDGb: 0.26  
DEb: -48.8  
DGr: 41.4  
IP: 0.0  
LEDGF Binder: None

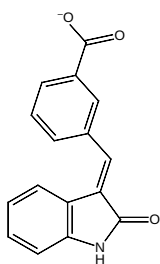

title: AVX17285\_0  
FE: -7.4  
DGb: -7.4  
dDGb: 0.12  
DEb: -37.9  
DGr: 30.5  
IP: 0.0  
LEDGF Binder: 1

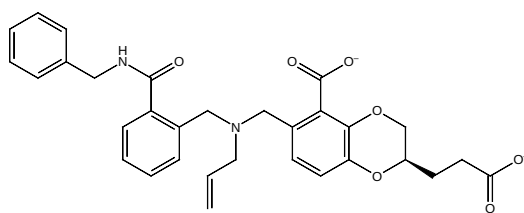

title: AVX38753\_3\_1  
FE: -7.4  
DGb: -7.9  
dDGb: 0.16  
DEb: -47.3  
DGr: 39.4  
IP: 0.5  
LEDGF Binder: 1

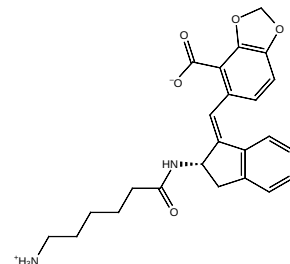

title: AVX101124\_1  
FE: -7.3  
DGb: -7.3  
dDGb: 0.14  
DEb: -48.0  
DGr: 40.7  
IP: 0.0  
LEDGF Binder: 1

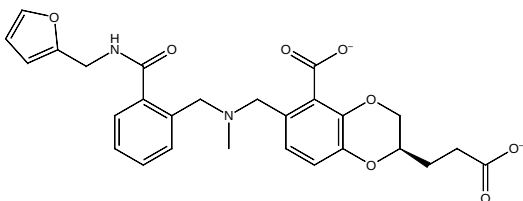

title: AVX38789\_2\_1  
FE: -7.3  
DGb: -7.8  
dDGB: 0.1  
DEb: -45.4  
DGr: 37.6  
IP: 0.5  
LEDGF Binder: None

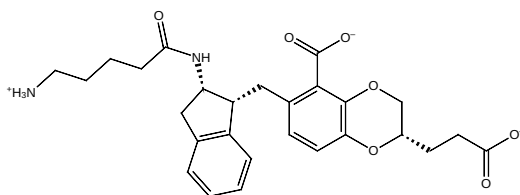

title: AVX38748\_0  
FE: -7.3  
DGb: -7.3  
dDGB: 0.43  
DEb: -57.4  
DGr: 50.1  
IP: 0.0  
LEDGF Binder: 1

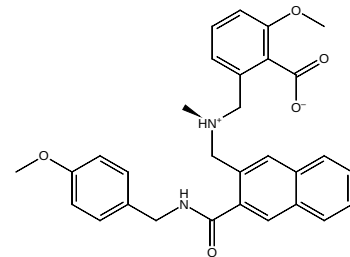

title: AVX101121\_0  
FE: -7.3  
DGb: -7.6  
dDGB: 0.28  
DEb: -47.2  
DGr: 39.6  
IP: 0.3  
LEDGF Binder: None

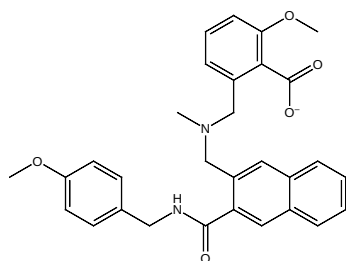

title: AVX101121\_0\_1  
FE: -7.3  
DGb: -7.8  
dDGB: 0.26  
DEb: -50.9  
DGr: 43.1  
IP: 0.5  
LEDGF Binder: 1

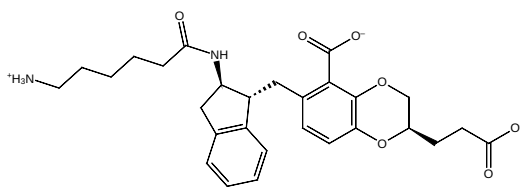

title: AVX38747\_5  
FE: -7.2  
DGb: -7.2  
dDGB: 0.66  
DEb: -55.2  
DGr: 48.0  
IP: 0.0  
LEDGF Binder: None

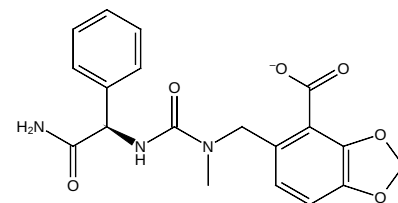

title: AVX38669\_0  
FE: -7.2  
DGb: -7.2  
dDGB: 0.15  
DEb: -41.8  
DGr: 34.6  
IP: 0.0  
LEDGF Binder: None

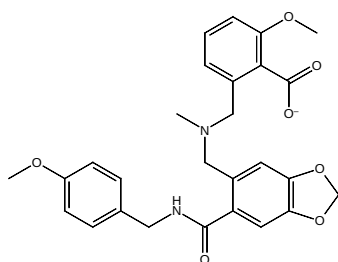

title: AVX101119\_0\_1  
FE: -6.8  
DGb: -7.4  
dDGB: 0.43  
DEb: -50.6  
DGr: 43.2  
IP: 0.6  
LEDGF Binder: 1

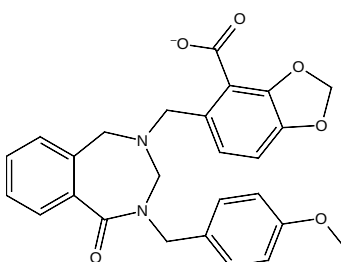

title: AVX17687\_1\_1  
FE: -6.7  
DGb: -6.8  
dDGB: 0.02  
DEb: -42.4  
DGr: 35.6  
IP: 0.0  
LEDGF Binder: None

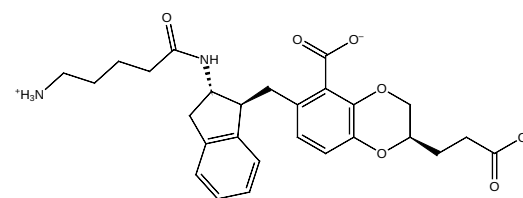

title: AVX38748\_6  
FE: -6.7  
DGb: -6.7  
dDGB: 0.13  
DEb: -48.2  
DGr: 41.5  
IP: 0.0  
LEDGF Binder: None

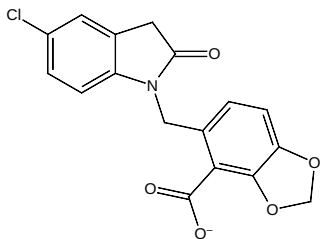

title: AVX40868\_0  
FE: -6.4  
DGb: -6.4  
dDGb: 0.1  
DEb: -40.2  
DGr: 33.8  
IP: 0.0  
LEDGF Binder: None

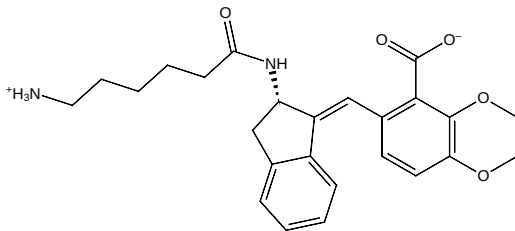

title: AVX101133\_1  
FE: -6.4  
DGb: -6.4  
dDGb: 0.44  
DEb: -48.9  
DGr: 42.5  
IP: 0.0  
LEDGF Binder: None

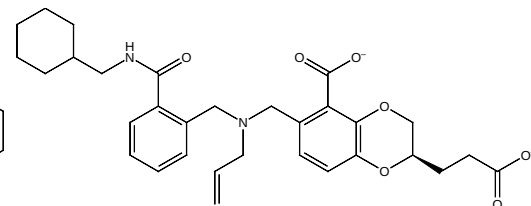

title: AVX38781\_2\_1  
FE: -6.2  
DGb: -6.7  
dDGb: 0.08  
DEb: -46.0  
DGr: 39.4  
IP: 0.5  
LEDGF Binder: None

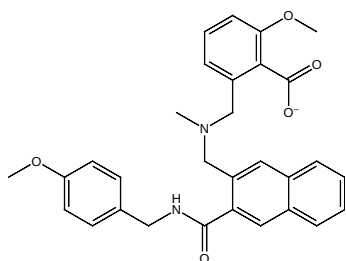

title: AVX101121\_1\_1  
FE: -6.1  
DGb: -6.6  
dDGb: 0.38  
DEb: -47.4  
DGr: 40.8  
IP: 0.5  
LEDGF Binder: None

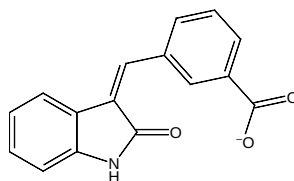

title: AVX16980\_0  
FE: -6.1  
DGb: -6.1  
dDGb: 0.21  
DEb: -38.1  
DGr: 32.0  
IP: 0.0  
LEDGF Binder: None

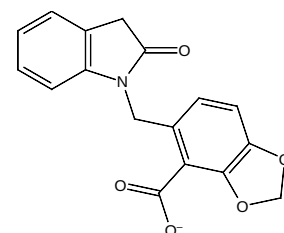

title: AVX17377\_0  
FE: -5.9  
DGb: -5.9  
dDGb: 0.12  
DEb: -38.9  
DGr: 33.0  
IP: 0.0  
LEDGF Binder: 1

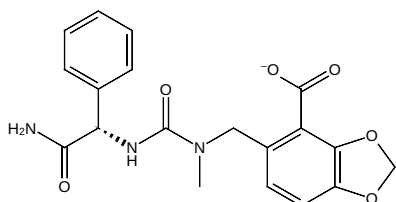

title: AVX38669\_1  
FE: -5.9  
DGb: -5.9  
dDGb: 0.16  
DEb: -40.6  
DGr: 34.7  
IP: 0.0  
LEDGF Binder: None

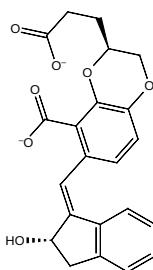

title: AVX38743\_5  
FE: -5.9  
DGb: -5.9  
dDGb: 0.41  
DEb: -43.2  
DGr: 37.3  
IP: 0.0  
LEDGF Binder: 1

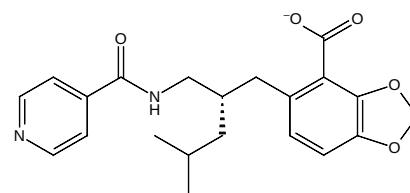

title: GL5243104\_0  
FE: -5.7  
DGb: -5.7  
dDGb: 0.73  
DEb: -37.3  
DGr: 31.5  
IP: 0.0  
LEDGF Binder: 1

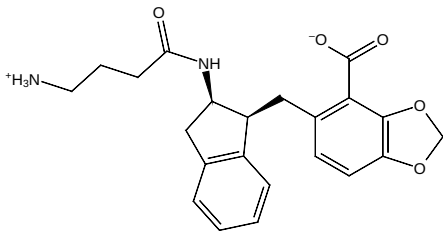

title: AVX17558\_3  
 FE: -5.7  
 DGb: -5.7  
 dDGb: 0.02  
 DEb: -45.8  
 DGr: 40.1  
 IP: 0.0  
 LEDGF Binder: 1

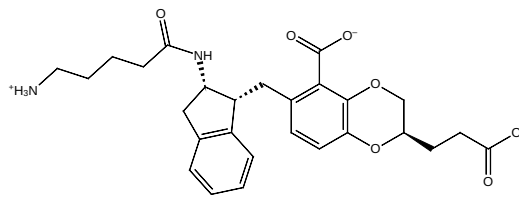

title: AVX38748\_4  
 FE: -5.6  
 DGb: -5.6  
 dDGb: 0.04  
 DEb: -54.9  
 DGr: 49.3  
 IP: 0.0  
 LEDGF Binder: None

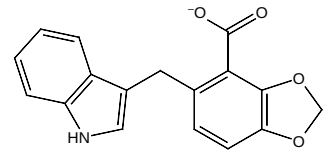

title: AVX17287\_0  
 FE: -5.6  
 DGb: -5.6  
 dDGb: 0.38  
 DEb: -40.8  
 DGr: 35.2  
 IP: 0.0  
 LEDGF Binder: 1

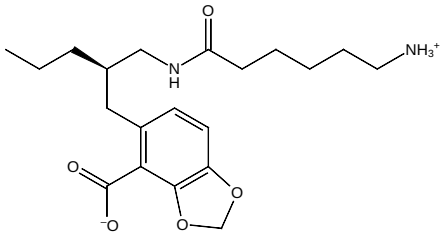

title: AVX17680\_1  
 FE: -5.6  
 DGb: -5.6  
 dDGb: 0.03  
 DEb: -45.7  
 DGr: 40.1  
 IP: 0.0  
 LEDGF Binder: None

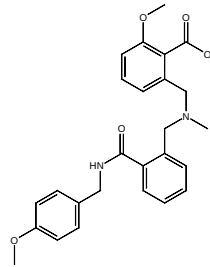

title: AVX101122\_1\_1  
 FE: -5.6  
 DGb: -6.0  
 dDGb: 0.59  
 DEb: -54.6  
 DGr: 48.5  
 IP: 0.5  
 LEDGF Binder: 1

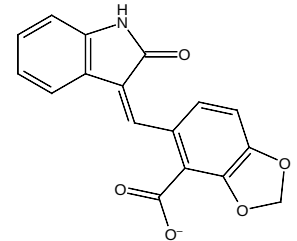

title: AVX17286\_1  
 FE: -5.5  
 DGb: -5.5  
 dDGb: 0.5  
 DEb: -38.1  
 DGr: 32.6  
 IP: 0.0  
 LEDGF Binder: None

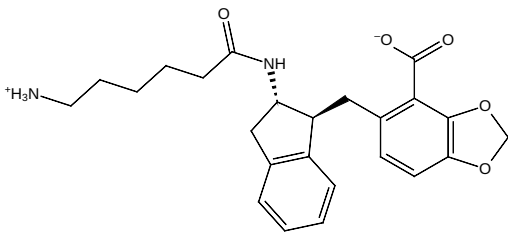

title: AVX17557\_2  
 FE: -5.3  
 DGb: -5.3  
 dDGb: 0.58  
 DEb: -48.3  
 DGr: 43.0  
 IP: 0.0  
 LEDGF Binder: 1

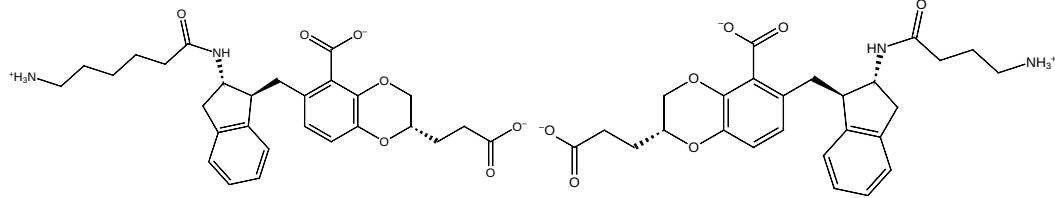

title: AVX38747\_2  
 FE: -5.3  
 DGb: -5.3  
 dDGb: 0.0  
 DEb: -48.8  
 DGr: 43.5  
 IP: 0.0  
 LEDGF Binder: None

title: AVX38749\_5  
 FE: -5.2  
 DGb: -5.2  
 dDGb: 0.05  
 DEb: -48.4  
 DGr: 43.2  
 IP: 0.0  
 LEDGF Binder: None

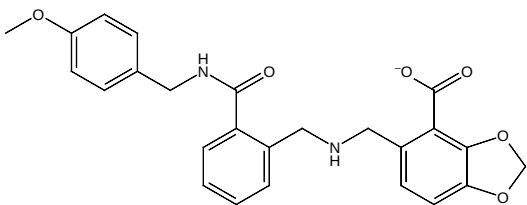

title: AVX17715\_0\_1  
 FE: -5.2  
 DGb: -6.0  
 dDGB: 0.14  
 DEb: -43.8  
 DGr: 37.8  
 IP: 0.9  
 LEDGF Binder: None

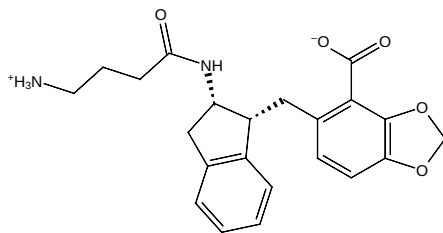

title: AVX17558\_0  
 FE: -5.1  
 DGb: -5.1  
 dDGB: 0.75  
 DEb: -44.5  
 DGr: 39.4  
 IP: 0.0  
 LEDGF Binder: None

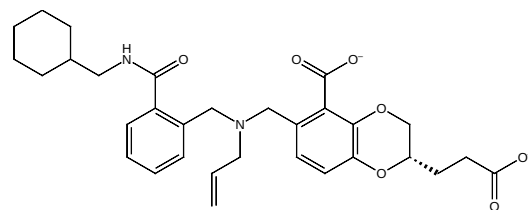

title: AVX38781\_0\_1  
 FE: -5.0  
 DGb: -5.5  
 dDGB: 0.04  
 DEb: -47.1  
 DGr: 41.6  
 IP: 0.5  
 LEDGF Binder: None

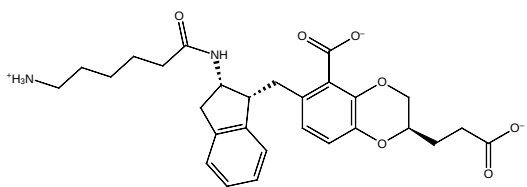

title: AVX38747\_4  
 FE: -4.9  
 DGb: -4.9  
 dDGB: 0.46  
 DEb: -50.4  
 DGr: 45.5  
 IP: 0.0  
 LEDGF Binder: None

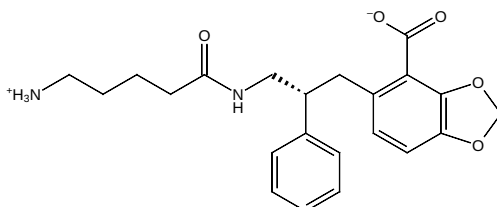

title: AVX101123\_1  
 FE: -4.9  
 DGb: -4.9  
 dDGB: 1.17  
 DEb: -42.8  
 DGr: 37.9  
 IP: 0.0  
 LEDGF Binder: None

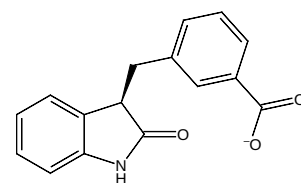

title: AVX17259\_1  
 FE: -4.9  
 DGb: -4.9  
 dDGB: 0.65  
 DEb: -37.0  
 DGr: 32.2  
 IP: 0.0  
 LEDGF Binder: None

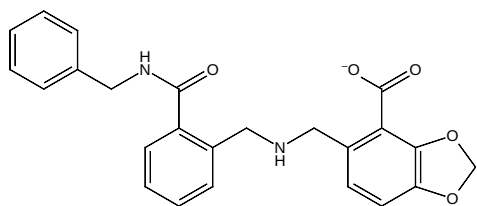

title: AVX17684m\_0\_1  
 FE: -4.8  
 DGb: -5.7  
 dDGB: 0.02  
 DEb: -41.6  
 DGr: 35.9  
 IP: 0.9  
 LEDGF Binder: 1

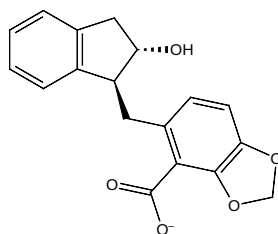

title: AVX17375\_2  
 FE: -4.7  
 DGb: -4.7  
 dDGB: 0.24  
 DEb: -40.6  
 DGr: 35.9  
 IP: 0.0  
 LEDGF Binder: 1

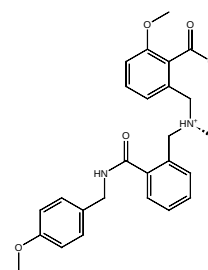

title: AVX101122\_1  
 FE: -4.7  
 DGb: -5.1  
 dDGB: 0.69  
 DEb: -44.7  
 DGr: 39.7  
 IP: 0.3  
 LEDGF Binder: None

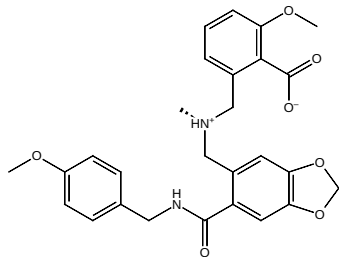

title: AVX101119\_1  
FE: -4.7  
DGb: -5.0  
dDGb: 0.06  
DEb: -46.0  
DGr: 41.0  
IP: 0.3  
LEDGF Binder: None

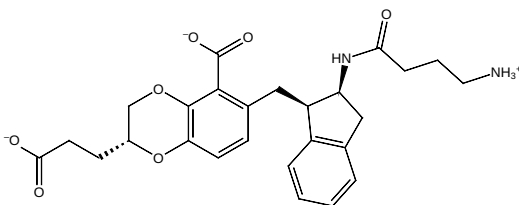

title: AVX38749\_4  
FE: -4.7  
DGb: -4.7  
dDGb: 0.41  
DEb: -51.8  
DGr: 47.1  
IP: 0.0  
LEDGF Binder: None

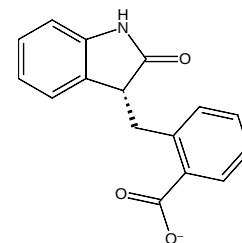

title: AVX17268\_1  
FE: -4.7  
DGb: -4.7  
dDGb: 0.22  
DEb: -36.4  
DGr: 31.7  
IP: 0.0  
LEDGF Binder: None

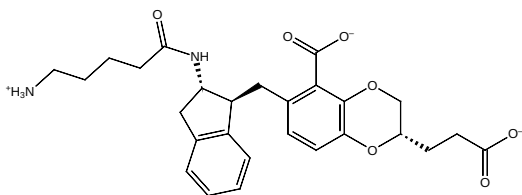

title: AVX38748\_2  
FE: -4.6  
DGb: -4.6  
dDGb: 0.98  
DEb: -43.4  
DGr: 38.8  
IP: 0.0  
LEDGF Binder: None

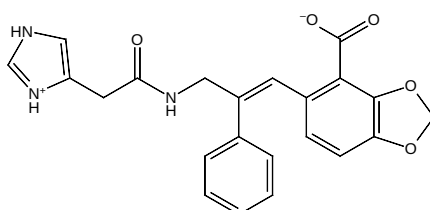

title: AVX62778\_0  
FE: -4.6  
DGb: -6.0  
dDGb: 0.44  
DEb: -47.7  
DGr: 41.7  
IP: 1.5  
LEDGF Binder: None

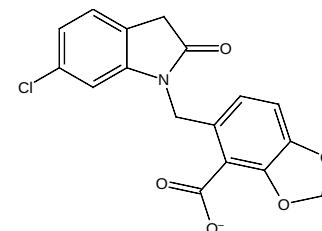

title: AVX40883\_0  
FE: -4.5  
DGb: -4.5  
dDGb: 0.31  
DEb: -38.0  
DGr: 33.4  
IP: 0.0  
LEDGF Binder: None

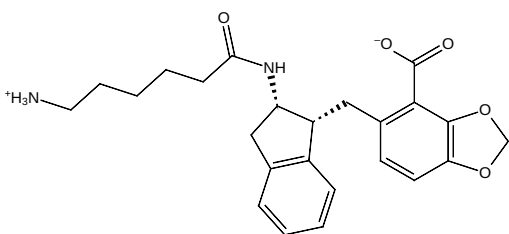

title: AVX17557\_0  
FE: -4.5  
DGb: -4.5  
dDGb: 0.21  
DEb: -50.2  
DGr: 45.7  
IP: 0.0  
LEDGF Binder: None

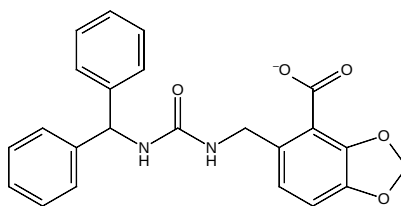

title: AVX17627\_0  
FE: -4.5  
DGb: -4.5  
dDGb: 0.89  
DEb: -46.1  
DGr: 41.6  
IP: 0.0  
LEDGF Binder: None

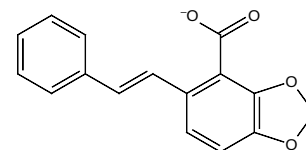

title: AVX40911\_1  
FE: -4.5  
DGb: -4.5  
dDGb: 0.41  
DEb: -35.2  
DGr: 30.8  
IP: 0.0  
LEDGF Binder: None

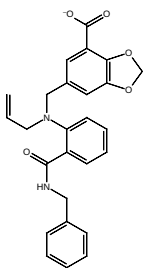

title: AVX38752\_1\_1  
FE: -4.4  
DGb: -4.4  
dDGb: 0.69  
DEb: -39.9  
DGr: 35.5  
IP: 0.0  
LEDGF Binder: None

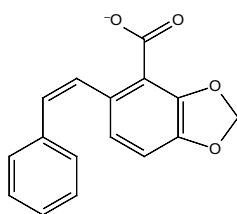

title: AVX40911\_0  
FE: -4.4  
DGb: -4.4  
dDGb: 0.15  
DEb: -36.2  
DGr: 31.8  
IP: 0.0  
LEDGF Binder: 1



title: AVX38781\_1\_1  
FE: -4.4  
DGb: -4.9  
dDGb: 0.49  
DEb: -44.7  
DGr: 39.9  
IP: 0.5  
LEDGF Binder: 1

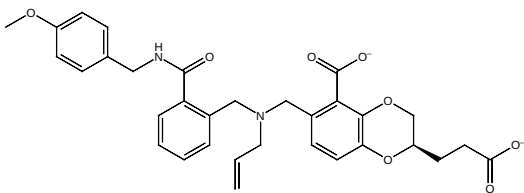

title: AVX38780\_2\_1  
FE: -4.3  
DGb: -4.8  
dDGb: 0.53  
DEb: -44.4  
DGr: 39.6  
IP: 0.5  
LEDGF Binder: None

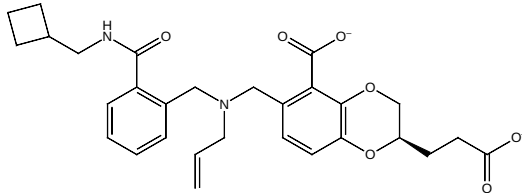

title: AVX38782\_3\_1  
FE: -4.2  
DGb: -4.7  
dDGb: 0.28  
DEb: -45.3  
DGr: 40.6  
IP: 0.5  
LEDGF Binder: None

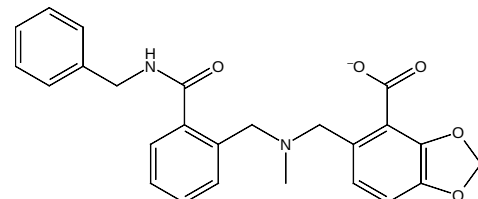

title: AVX38708\_1\_1  
FE: -4.2  
DGb: -4.7  
dDGb: 0.41  
DEb: -45.0  
DGr: 40.2  
IP: 0.5  
LEDGF Binder: 1

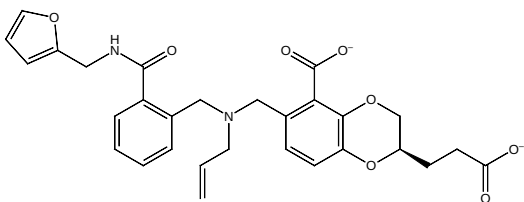

title: AVX38783\_2\_1  
FE: -4.2  
DGb: -4.6  
dDGb: 0.05  
DEb: -45.9  
DGr: 41.2  
IP: 0.5  
LEDGF Binder: None

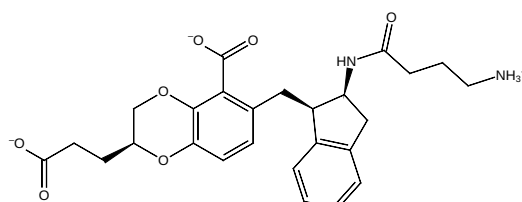

title: AVX38749\_0  
FE: -4.1  
DGb: -4.2  
dDGb: 1.16  
DEb: -53.6  
DGr: 49.5  
IP: 0.0  
LEDGF Binder: 1

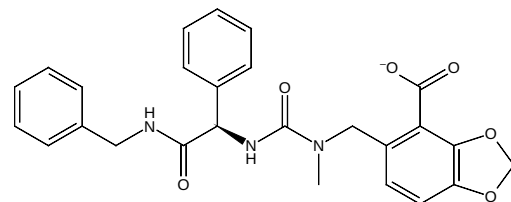

title: AVX38674\_1  
FE: -4.1  
DGb: -4.1  
dDGb: 0.02  
DEb: -46.4  
DGr: 42.3  
IP: 0.0  
LEDGF Binder: None



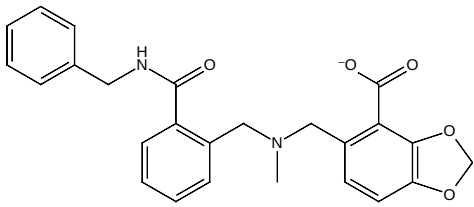

title: AVX38708\_0\_1  
FE: -4.1  
DGb: -4.6  
dDGb: 0.5  
DEb: -49.4  
DGr: 44.8  
IP: 0.5  
LEDGF Binder: None

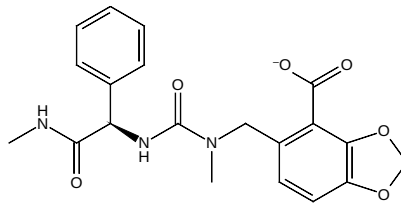

title: AVX38671\_1  
FE: -4.0  
DGb: -4.0  
dDGb: 0.18  
DEb: -40.5  
DGr: 36.4  
IP: 0.0  
LEDGF Binder: None

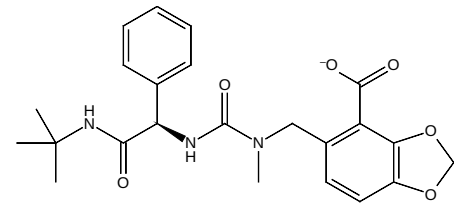

title: AVX38672\_0  
FE: -4.0  
DGb: -4.0  
dDGb: 0.58  
DEb: -39.2  
DGr: 35.2  
IP: 0.0  
LEDGF Binder: 1

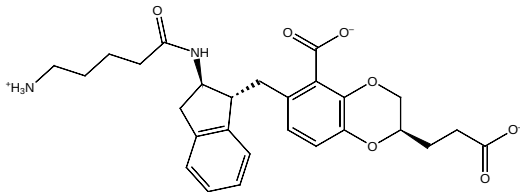

title: AVX38748\_5  
FE: -4.0  
DGb: -4.0  
dDGb: 0.51  
DEb: -51.9  
DGr: 47.9  
IP: 0.0  
LEDGF Binder: None

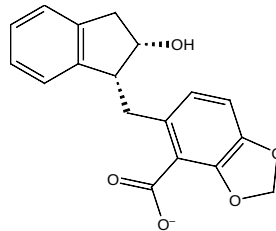

title: AVX17375\_0  
FE: -4.0  
DGb: -4.0  
dDGb: 0.2  
DEb: -35.9  
DGr: 31.9  
IP: 0.0  
LEDGF Binder: None

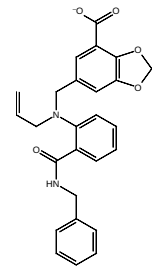

title: AVX38752\_0\_1  
FE: -4.0  
DGb: -4.0  
dDGb: 0.23  
DEb: -43.0  
DGr: 39.1  
IP: 0.0  
LEDGF Binder: None

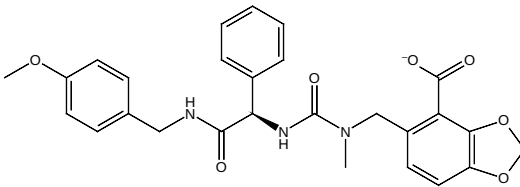

title: AVX38670\_1  
FE: -3.9  
DGb: -3.9  
dDGb: 0.2  
DEb: -43.2  
DGr: 39.3  
IP: 0.0  
LEDGF Binder: None

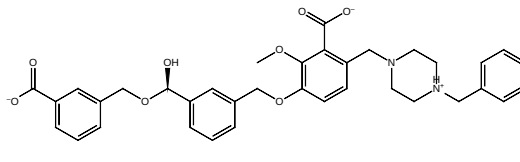

title: AVX40989\_1  
FE: -3.9  
DGb: -4.3  
dDGb: 0.17  
DEb: -76.9  
DGr: 72.6  
IP: 0.4  
LEDGF Binder: None

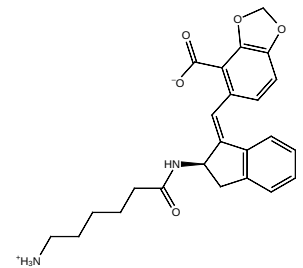

title: AVX101124\_3  
FE: -3.9  
DGb: -3.9  
dDGb: 0.32  
DEb: -45.6  
DGr: 41.7  
IP: 0.0  
LEDGF Binder: None

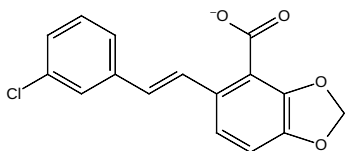

title: AVX40988\_0  
FE: -3.9  
DGb: -3.9  
dDGb: 0.15  
DEb: -35.4  
DGr: 31.5  
IP: 0.0  
LEDGF Binder: None

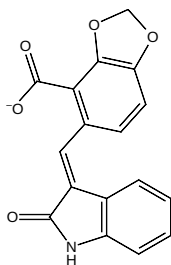

title: AVX17286\_0  
FE: -3.8  
DGb: -3.8  
dDGb: 0.11  
DEb: -35.4  
DGr: 31.5  
IP: 0.0  
LEDGF Binder: 1

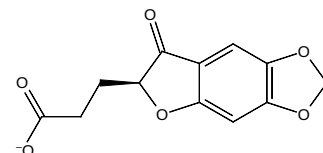

title: AVX17269\_0  
FE: -3.8  
DGb: -3.8  
dDGb: 0.42  
DEb: -42.2  
DGr: 38.4  
IP: 0.0  
LEDGF Binder: None

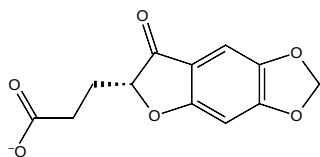

title: AVX17269\_1  
FE: -3.7  
DGb: -3.7  
dDGb: 1.02  
DEb: -34.7  
DGr: 30.9  
IP: 0.0  
LEDGF Binder: None

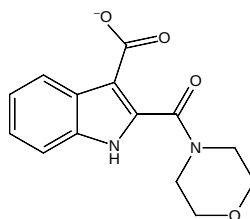

title: AVX17386\_0  
FE: -3.7  
DGb: -3.7  
dDGb: 0.74  
DEb: -33.5  
DGr: 29.8  
IP: 0.0  
LEDGF Binder: None

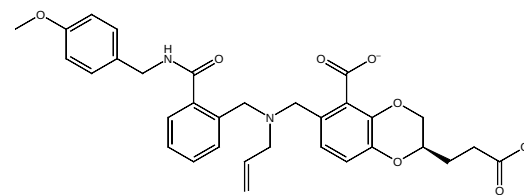

title: AVX38780\_3\_1  
FE: -3.7  
DGb: -4.2  
dDGb: 0.28  
DEb: -47.8  
DGr: 43.6  
IP: 0.5  
LEDGF Binder: None

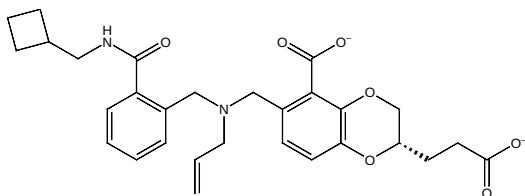

title: AVX38782\_0\_1  
FE: -3.7  
DGb: -4.2  
dDGb: 0.46  
DEb: -45.2  
DGr: 41.0  
IP: 0.5  
LEDGF Binder: None

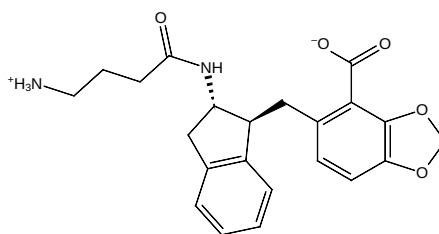

title: AVX17558\_2  
FE: -3.6  
DGb: -3.6  
dDGb: 0.11  
DEb: -46.5  
DGr: 42.8  
IP: 0.0  
LEDGF Binder: None

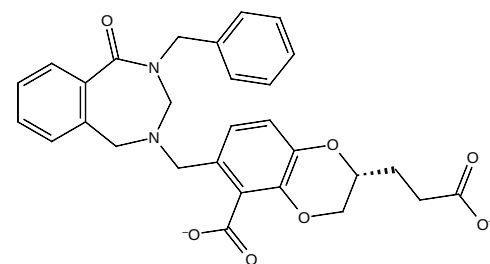

title: AVX38741\_2\_1  
FE: -3.6  
DGb: -3.7  
dDGb: 0.07  
DEb: -40.9  
DGr: 37.2  
IP: 0.0  
LEDGF Binder: None

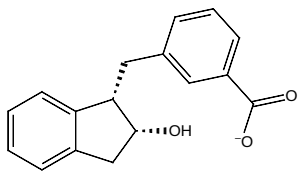

title: AVX17369\_0  
FE: -3.6  
DGb: -3.6  
dDGb: 0.24  
DEb: -35.0  
DGr: 31.4  
IP: 0.0  
LEDGF Binder: None

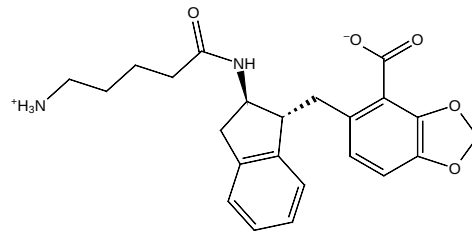

title: AVX17556\_2  
FE: -3.5  
DGb: -3.5  
dDGb: 0.18  
DEb: -45.6  
DGr: 42.0  
IP: 0.0  
LEDGF Binder: None

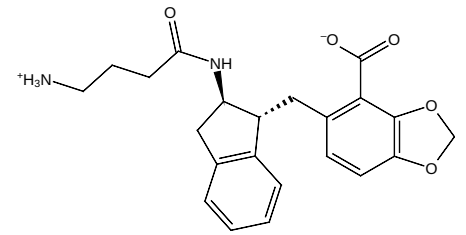

title: AVX17558\_1  
FE: -3.5  
DGb: -3.5  
dDGb: 0.75  
DEb: -44.3  
DGr: 40.8  
IP: 0.0  
LEDGF Binder: None

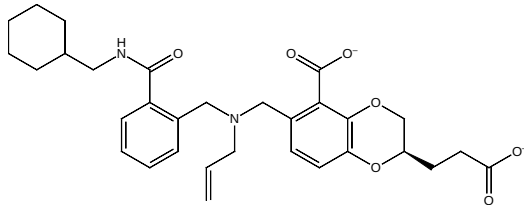

title: AVX38781\_3\_1  
FE: -3.5  
DGb: -4.0  
dDGb: 0.55  
DEb: -43.9  
DGr: 39.9  
IP: 0.5  
LEDGF Binder: None

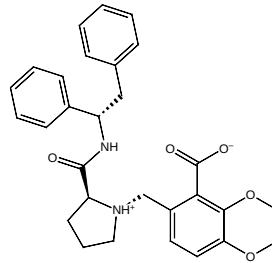

title: AVX62807\_0  
FE: -3.5  
DGb: -3.6  
dDGb: 0.22  
DEb: -43.0  
DGr: 39.5  
IP: 0.1  
LEDGF Binder: None

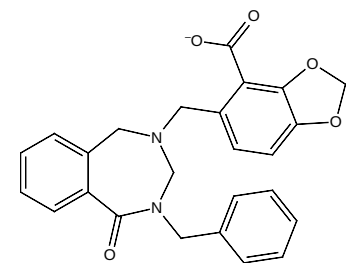

title: AVX17684\_1\_1  
FE: -3.5  
DGb: -3.5  
dDGb: 0.25  
DEb: -40.0  
DGr: 36.5  
IP: 0.0  
LEDGF Binder: None

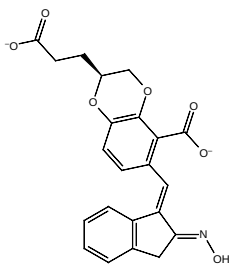

title: AVX38742\_2  
FE: -3.5  
DGb: -3.5  
dDGb: 0.33  
DEb: -47.9  
DGr: 44.5  
IP: 0.0  
LEDGF Binder: None

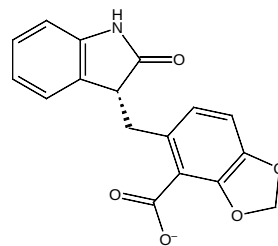

title: AVX17260\_1  
FE: -3.4  
DGb: -3.4  
dDGb: 0.26  
DEb: -36.1  
DGr: 32.7  
IP: 0.0  
LEDGF Binder: None

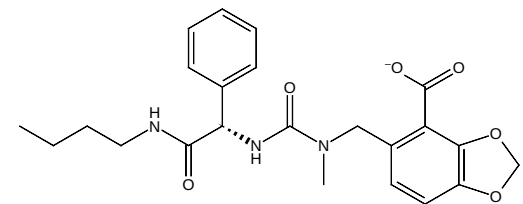

title: AVX38673\_1  
FE: -3.4  
DGb: -3.4  
dDGb: 0.37  
DEb: -45.2  
DGr: 41.8  
IP: 0.0  
LEDGF Binder: 1

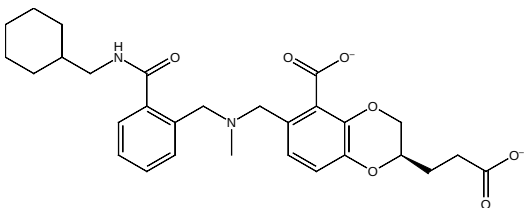

title: AVX38787\_3\_1

FE: -3.3

DGb: -3.9

dDGb: 0.9

DEb: -54.0

DGr: 50.2

IP: 0.5

LEDGF Binder: None

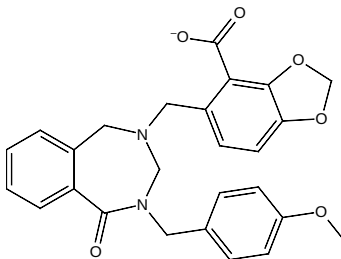

title: AVX17687\_0\_1

FE: -3.3

DGb: -3.4

dDGb: 0.79

DEb: -43.1

DGr: 39.7

IP: 0.0

LEDGF Binder: None

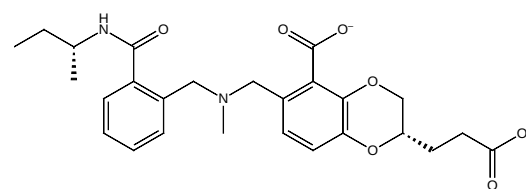

title: AVX38784\_2\_1

FE: -3.3

DGb: -3.8

dDGb: 0.07

DEb: -45.9

DGr: 42.1

IP: 0.5

LEDGF Binder: None

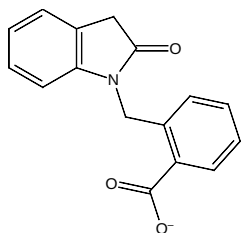

title: AVX17257\_0

FE: -3.3

DGb: -3.3

dDGb: 0.02

DEb: -32.8

DGr: 29.5

IP: 0.0

LEDGF Binder: 1

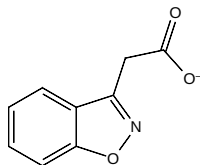

title: AVX17679\_0

FE: -3.3

DGb: -3.3

dDGb: 0.56

DEb: -32.1

DGr: 28.8

IP: 0.0

LEDGF Binder: 1

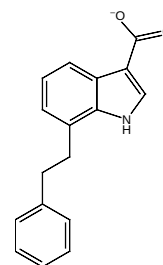

title: AVX17476\_0

FE: -3.3

DGb: -3.3

dDGb: 0.04

DEb: -43.2

DGr: 40.0

IP: 0.0

LEDGF Binder: None

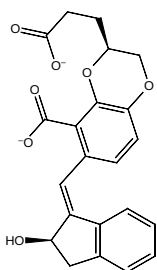

title: AVX38743\_7

FE: -3.2

DGb: -3.2

dDGb: 0.15

DEb: -41.4

DGr: 38.2

IP: 0.0

LEDGF Binder: None

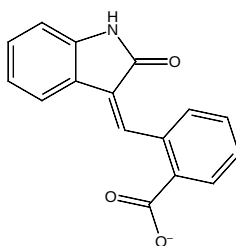

title: AVX17284\_0

FE: -3.2

DGb: -3.2

dDGb: 0.32

DEb: -34.8

DGr: 31.5

IP: 0.0

LEDGF Binder: None

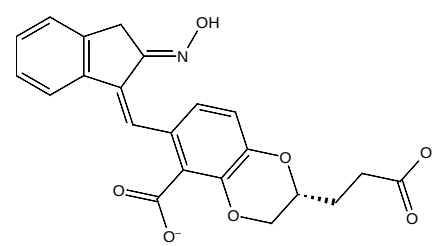

title: AVX38742\_4

FE: -3.2

DGb: -3.2

dDGb: 1.18

DEb: -43.5

DGr: 40.3

IP: 0.0

LEDGF Binder: None

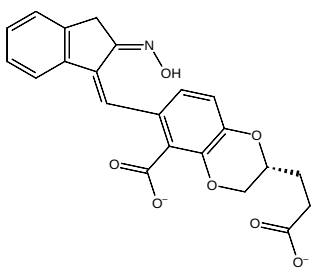

title: AVX38742\_5  
FE: -3.2  
DGb: -3.2  
dDGb: 0.76  
DEb: -41.2  
DGr: 38.0  
IP: 0.0  
LEDGF Binder: None

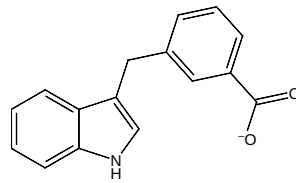

title: AVX16981\_0  
FE: -3.2  
DGb: -3.2  
dDGb: 0.09  
DEb: -34.2  
DGr: 31.0  
IP: 0.0  
LEDGF Binder: None

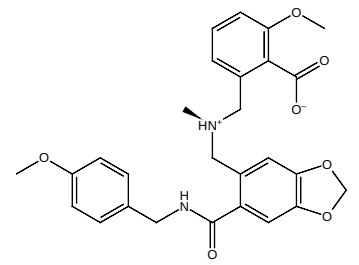

title: AVX101119\_0  
FE: -3.2  
DGb: -3.5  
dDGb: 0.77  
DEb: -44.6  
DGr: 41.1  
IP: 0.3  
LEDGF Binder: None

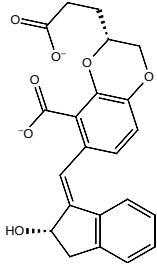

title: AVX38743\_1  
FE: -3.2  
DGb: -3.2  
dDGb: 1.25  
DEb: -46.0  
DGr: 42.8  
IP: 0.0  
LEDGF Binder: None

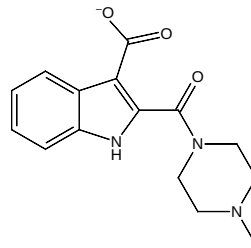

title: AVX17478\_0\_1  
FE: -3.2  
DGb: -3.4  
dDGb: 0.38  
DEb: -32.4  
DGr: 29.0  
IP: 0.2  
LEDGF Binder: None

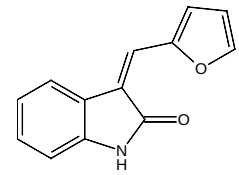

title: AVX16688\_0  
FE: -3.2  
DGb: -3.2  
dDGb: 0.14  
DEb: -19.5  
DGr: 16.4  
IP: 0.0  
LEDGF Binder: None

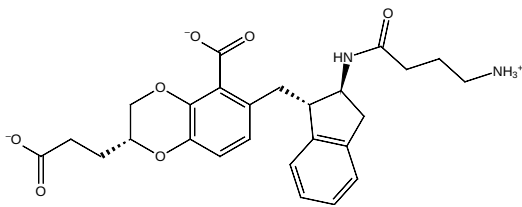

title: AVX38749\_6  
FE: -3.1  
DGb: -3.1  
dDGb: 1.55  
DEb: -52.4  
DGr: 49.3  
IP: 0.0  
LEDGF Binder: None

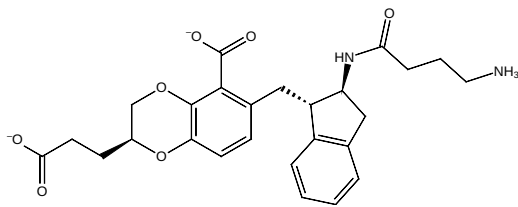

title: AVX38749\_2  
FE: -3.0  
DGb: -3.0  
dDGb: 0.61  
DEb: -53.4  
DGr: 50.4  
IP: 0.0  
LEDGF Binder: None

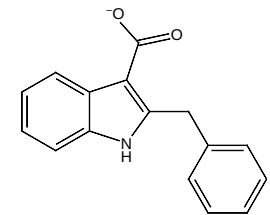

title: AVX17385\_0  
FE: -3.0  
DGb: -3.0  
dDGb: 0.48  
DEb: -37.0  
DGr: 34.0  
IP: 0.0  
LEDGF Binder: None

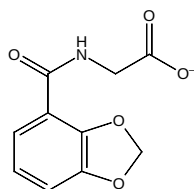

title: AVX17389\_0  
FE: -3.0  
DGb: -3.0  
dDGb: 0.38  
DEb: -34.1  
DGr: 31.1  
IP: 0.0  
LEDGF Binder: None

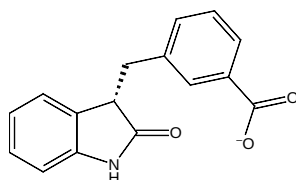

title: AVX17259\_0  
FE: -3.0  
DGb: -3.0  
dDGb: 0.46  
DEb: -35.5  
DGr: 32.5  
IP: 0.0  
LEDGF Binder: None

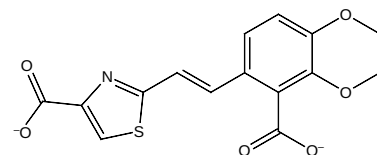

title: AVX62730\_0  
FE: -3.0  
DGb: -3.0  
dDGb: 0.64  
DEb: -38.3  
DGr: 35.3  
IP: 0.0  
LEDGF Binder: None

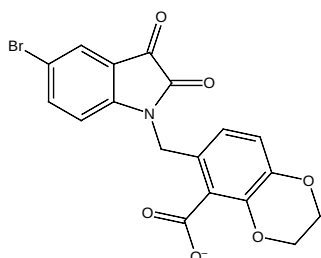

title: AVX101140\_0  
FE: -3.0  
DGb: -3.0  
dDGb: 0.13  
DEb: -33.6  
DGr: 30.6  
IP: 0.0  
LEDGF Binder: 1

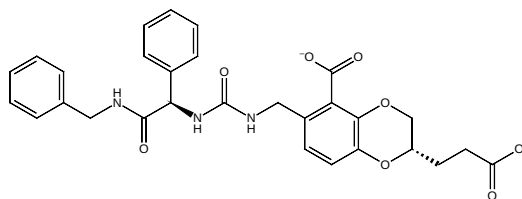

title: AVX17734\_1  
FE: -3.0  
DGb: -3.0  
dDGb: 0.23  
DEb: -50.5  
DGr: 47.5  
IP: 0.0  
LEDGF Binder: None

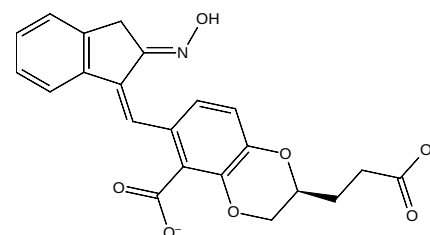

title: AVX38742\_0  
FE: -3.0  
DGb: -3.0  
dDGb: 0.25  
DEb: -45.3  
DGr: 42.3  
IP: 0.0  
LEDGF Binder: None

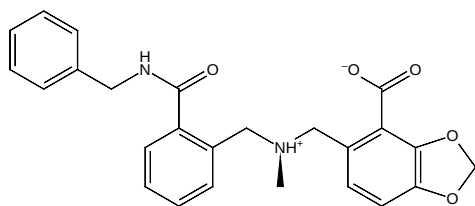

title: AVX38708\_0  
FE: -3.0  
DGb: -3.3  
dDGb: 0.3  
DEb: -40.1  
DGr: 36.8  
IP: 0.3  
LEDGF Binder: None

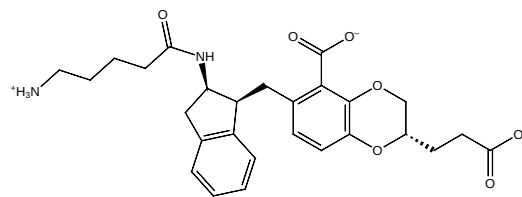

title: AVX38748\_3  
FE: -2.9  
DGb: -2.9  
dDGb: 0.15  
DEb: -55.1  
DGr: 52.2  
IP: 0.0  
LEDGF Binder: None

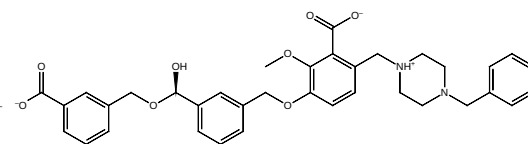

title: AVX40989\_1\_2  
FE: -2.9  
DGb: -3.2  
dDGb: 0.79  
DEb: -53.3  
DGr: 50.1  
IP: 0.3  
LEDGF Binder: None

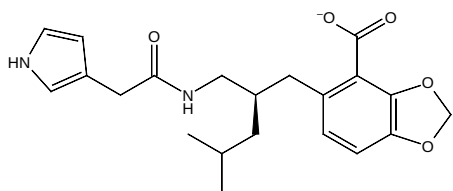

title: GL5243100\_1  
FE: -2.9  
DGb: -2.9  
dDGb: 0.41  
DEb: -40.1  
DGr: 37.3  
IP: 0.0  
LEDGF Binder: None

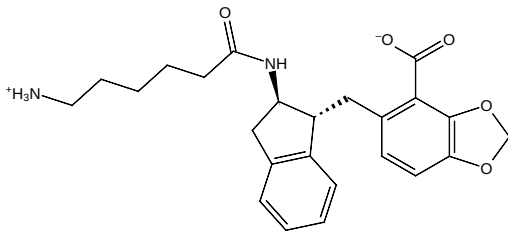

title: AVX17557\_1  
FE: -2.8  
DGb: -2.8  
dDGb: 0.84  
DEb: -42.0  
DGr: 39.2  
IP: 0.0  
LEDGF Binder: None

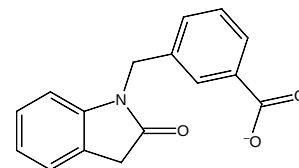

title: AVX17258\_0  
FE: -2.8  
DGb: -2.8  
dDGb: 0.46  
DEb: -34.9  
DGr: 32.1  
IP: 0.0  
LEDGF Binder: None

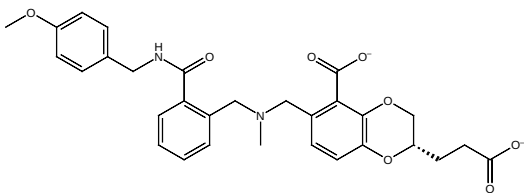

title: AVX38786\_1\_1  
FE: -2.8  
DGb: -3.3  
dDGb: 0.04  
DEb: -48.8  
DGr: 45.6  
IP: 0.5  
LEDGF Binder: 1

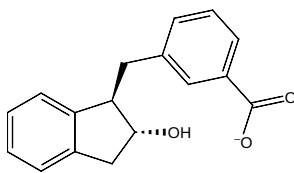

title: AVX17369\_2  
FE: -2.8  
DGb: -2.8  
dDGb: 0.44  
DEb: -31.7  
DGr: 28.9  
IP: 0.0  
LEDGF Binder: None

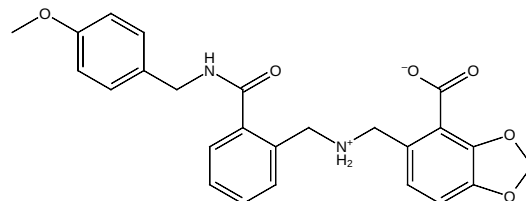

title: AVX17715\_0  
FE: -2.7  
DGb: -2.9  
dDGb: 0.62  
DEb: -40.3  
DGr: 37.4  
IP: 0.2  
LEDGF Binder: None

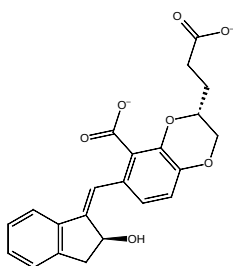

title: AVX38743\_0  
FE: -2.7  
DGb: -2.7  
dDGb: 0.24  
DEb: -38.8  
DGr: 36.1  
IP: 0.0  
LEDGF Binder: None

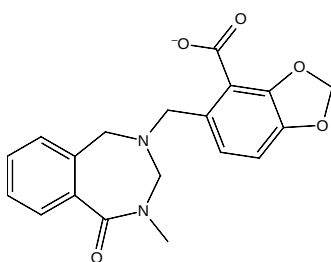

title: AVX17685\_0\_1  
FE: -2.7  
DGb: -2.7  
dDGb: 0.51  
DEb: -37.3  
DGr: 34.6  
IP: 0.1  
LEDGF Binder: None

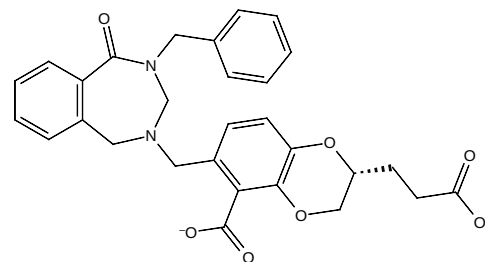

title: AVX38741\_3\_1  
FE: -2.6  
DGb: -2.7  
dDGb: 0.29  
DEb: -40.4  
DGr: 37.7  
IP: 0.0  
LEDGF Binder: None

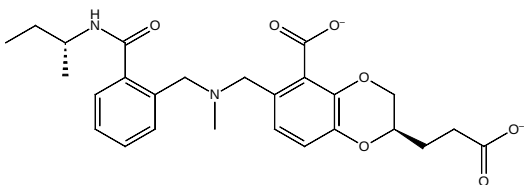

title: AVX38784\_6\_1  
FE: -2.6  
DGb: -3.1  
dDGb: 0.21  
DEb: -42.2  
DGr: 39.1  
IP: 0.5  
LEDGF Binder: None

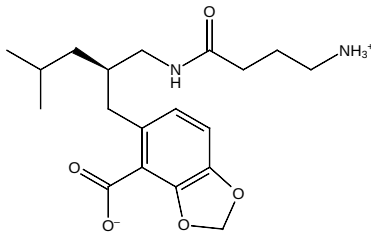

title: AVX17560\_1  
FE: -2.6  
DGb: -2.6  
dDGb: 0.27  
DEb: -42.7  
DGr: 40.1  
IP: 0.0  
LEDGF Binder: None

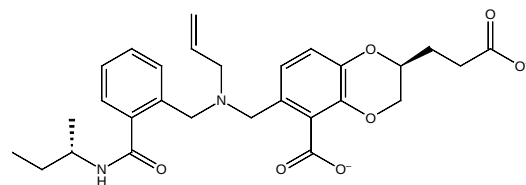

title: AVX38779\_1\_1  
FE: -2.6  
DGb: -3.1  
dDGb: 0.22  
DEb: -44.7  
DGr: 41.6  
IP: 0.5  
LEDGF Binder: None

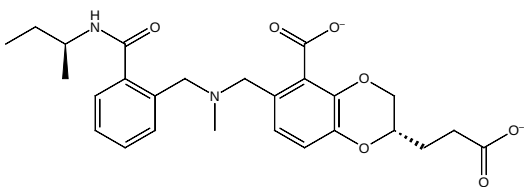

title: AVX38784\_1\_1  
FE: -2.6  
DGb: -3.1  
dDGb: 0.61  
DEb: -45.2  
DGr: 42.0  
IP: 0.5  
LEDGF Binder: None

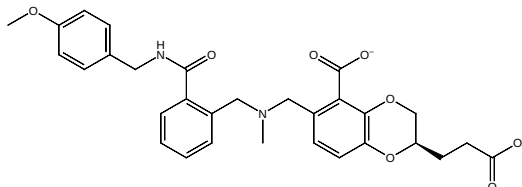

title: AVX38786\_2\_1  
FE: -2.6  
DGb: -3.1  
dDGb: 0.29  
DEb: -43.3  
DGr: 40.2  
IP: 0.5  
LEDGF Binder: None

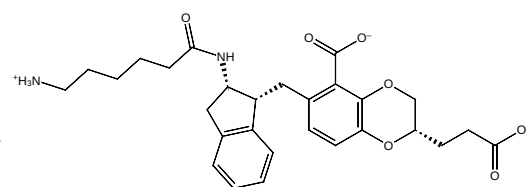

title: AVX38747\_0  
FE: -2.6  
DGb: -2.6  
dDGb: 1.3  
DEb: -38.5  
DGr: 35.9  
IP: 0.0  
LEDGF Binder: 1

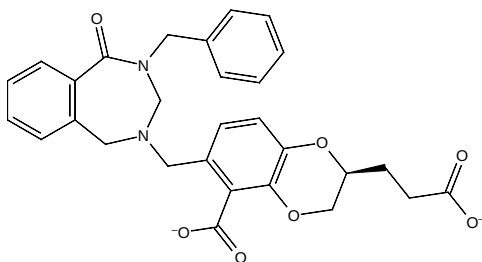

title: AVX38741\_0\_1  
FE: -2.6  
DGb: -2.6  
dDGb: 0.4  
DEb: -41.0  
DGr: 38.4  
IP: 0.0  
LEDGF Binder: None

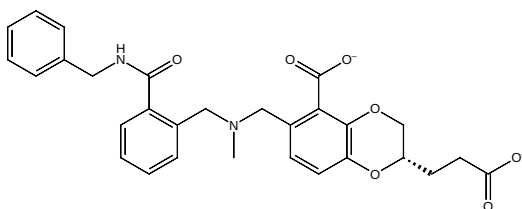

title: AVX38785\_1\_1  
FE: -2.6  
DGb: -3.0  
dDGb: 0.58  
DEb: -48.4  
DGr: 45.4  
IP: 0.5  
LEDGF Binder: 1

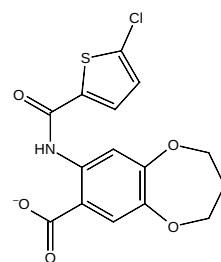

title: AVX16756\_0  
FE: -2.5  
DGb: -2.5  
dDGb: 0.0  
DEb: -34.1  
DGr: 31.5  
IP: 0.0  
LEDGF Binder: None



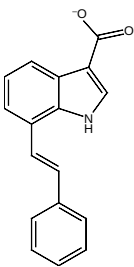

title: AVX17387\_0  
FE: -2.5  
DGb: -2.5  
dDGb: 0.28  
DEb: -30.0  
DGr: 27.5  
IP: 0.0  
LEDGF Binder: None

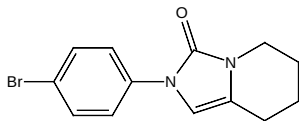

title: pC2A03\_0  
FE: -2.5  
DGb: -2.5  
dDGb: 0.11  
DEb: -22.1  
DGr: 19.6  
IP: 0.0  
LEDGF Binder: None

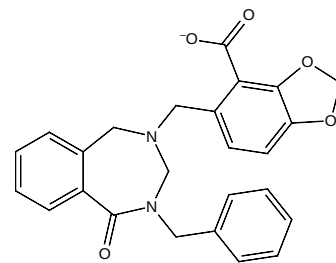

title: AVX17684\_0\_1  
FE: -2.5  
DGb: -2.5  
dDGb: 0.75  
DEb: -36.3  
DGr: 33.8  
IP: 0.0  
LEDGF Binder: None

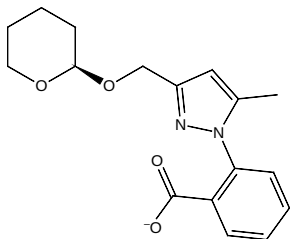

title: AVX17288\_0  
FE: -2.5  
DGb: -2.5  
dDGb: 0.46  
DEb: -32.7  
DGr: 30.2  
IP: 0.0  
LEDGF Binder: None

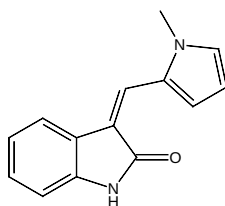

title: AVX40801\_0  
FE: -2.4  
DGb: -2.4  
dDGb: 0.13  
DEb: -19.9  
DGr: 17.5  
IP: 0.0  
LEDGF Binder: None

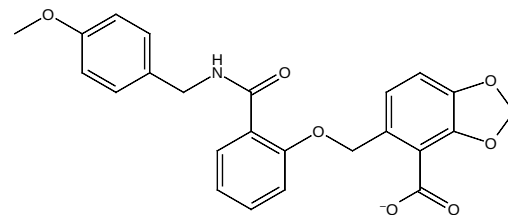

title: AVX40861\_0  
FE: -2.3  
DGb: -2.3  
dDGb: 1.94  
DEb: -43.5  
DGr: 41.3  
IP: 0.0  
LEDGF Binder: None

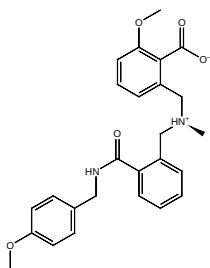

title: AVX101122\_0  
FE: -2.2  
DGb: -2.6  
dDGb: 0.04  
DEb: -35.2  
DGr: 32.6  
IP: 0.3  
LEDGF Binder: None

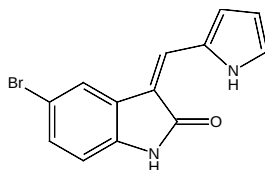

title: AVX62528\_0  
FE: -2.2  
DGb: -2.2  
dDGb: 0.05  
DEb: -20.1  
DGr: 17.9  
IP: 0.0  
LEDGF Binder: None

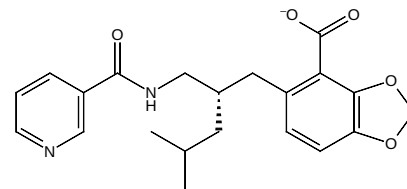

title: AVX40811\_0  
FE: -2.2  
DGb: -2.2  
dDGb: 0.29  
DEb: -37.6  
DGr: 35.4  
IP: 0.0  
LEDGF Binder: 1

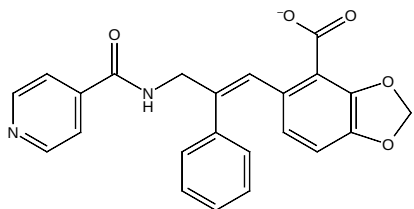

title: AVX62777\_0  
FE: -2.2  
DGb: -2.2  
dDGb: 0.09  
DEb: -40.2  
DGr: 38.0  
IP: 0.0  
LEDGF Binder: None

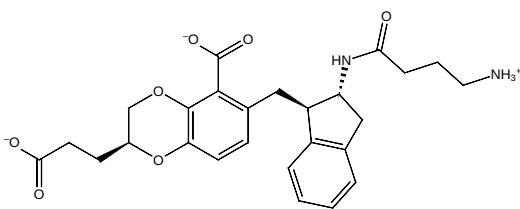

title: AVX38749\_1  
FE: -2.1  
DGb: -2.1  
dDGb: 0.38  
DEb: -54.9  
DGr: 52.7  
IP: 0.0  
LEDGF Binder: None

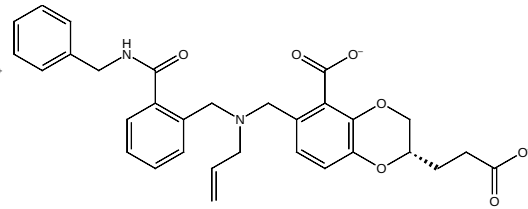

title: AVX38753\_0\_1  
FE: -2.0  
DGb: -2.5  
dDGb: 0.14  
DEb: -42.2  
DGr: 39.7  
IP: 0.5  
LEDGF Binder: None

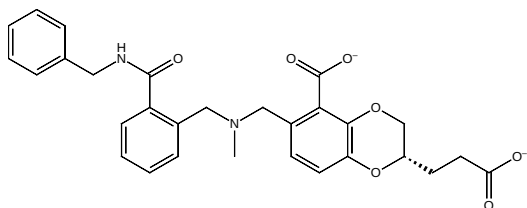

title: AVX38785\_0\_1  
FE: -2.0  
DGb: -2.5  
dDGb: 0.22  
DEb: -46.3  
DGr: 43.8  
IP: 0.5  
LEDGF Binder: None

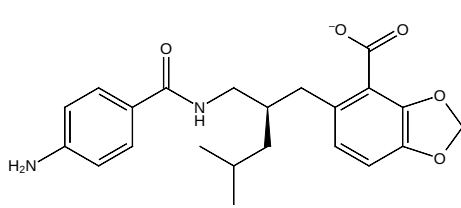

title: GL5243106\_1  
FE: -2.0  
DGb: -2.0  
dDGb: 0.48  
DEb: -39.6  
DGr: 37.6  
IP: 0.0  
LEDGF Binder: None

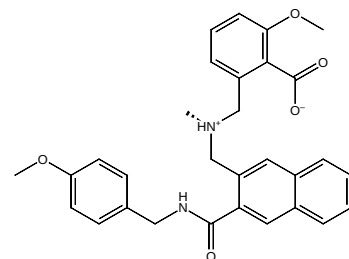

title: AVX101121\_1  
FE: -1.9  
DGb: -2.2  
dDGb: 0.04  
DEb: -42.8  
DGr: 40.6  
IP: 0.3  
LEDGF Binder: None

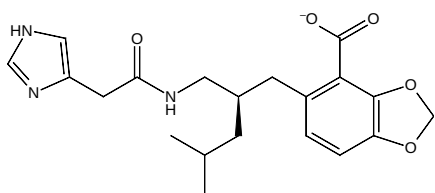

title: GL5243102\_1  
FE: -1.8  
DGb: -2.0  
dDGb: 0.41  
DEb: -36.8  
DGr: 34.8  
IP: 0.2  
LEDGF Binder: None

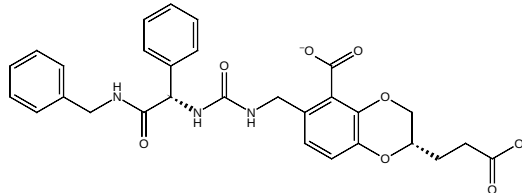

title: AVX17734\_3  
FE: -1.8  
DGb: -1.8  
dDGb: 0.53  
DEb: -45.9  
DGr: 44.1  
IP: 0.0  
LEDGF Binder: None

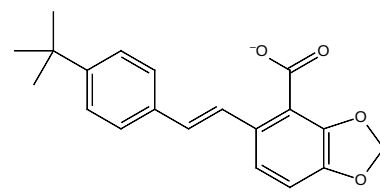

title: AVX40910\_0  
FE: -1.8  
DGb: -1.8  
dDGb: 0.46  
DEb: -36.0  
DGr: 34.2  
IP: 0.0  
LEDGF Binder: None

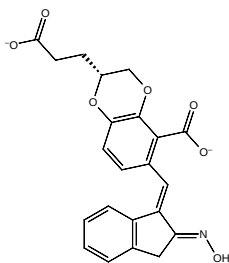

title: AVX38742\_6  
FE: -1.8  
DGb: -1.8  
dDGb: 0.65  
DEb: -39.4  
DGr: 37.5  
IP: 0.0  
LEDGF Binder: None

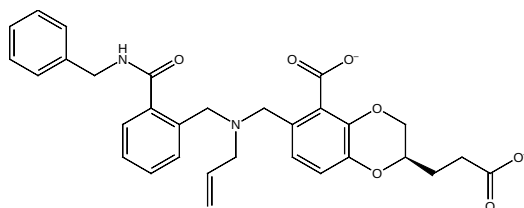

title: AVX38753\_2\_1  
FE: -1.8  
DGb: -2.3  
dDGb: 0.35  
DEb: -41.7  
DGr: 39.5  
IP: 0.5  
LEDGF Binder: None

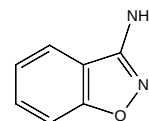

title: AVX17631\_0  
FE: -1.8  
DGb: -1.8  
dDGb: 0.09  
DEb: -11.9  
DGr: 10.1  
IP: 0.0  
LEDGF Binder: None

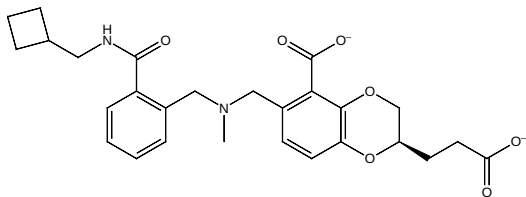

title: AVX38788\_3\_1  
FE: -1.8  
DGb: -2.3  
dDGb: 0.6  
DEb: -47.2  
DGr: 44.9  
IP: 0.5  
LEDGF Binder: None

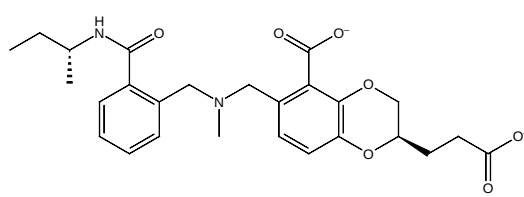

title: AVX38784\_4\_1  
FE: -1.8  
DGb: -2.3  
dDGb: 0.04  
DEb: -40.6  
DGr: 38.3  
IP: 0.5  
LEDGF Binder: None

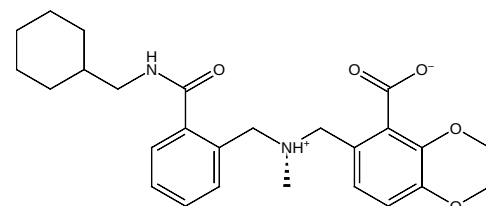

title: AVX101118\_1  
FE: -1.8  
DGb: -2.1  
dDGb: 0.57  
DEb: -41.3  
DGr: 39.2  
IP: 0.3  
LEDGF Binder: 1

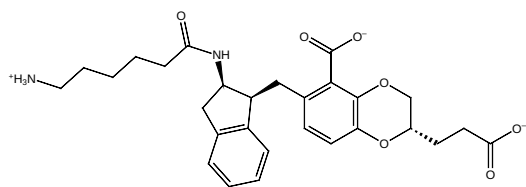

title: AVX38747\_3  
FE: -1.7  
DGb: -1.7  
dDGb: 0.58  
DEb: -50.3  
DGr: 48.5  
IP: 0.0  
LEDGF Binder: None

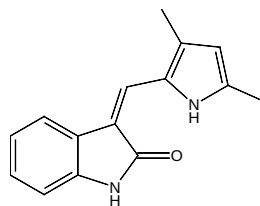

title: AVX62524\_0  
FE: -1.7  
DGb: -1.7  
dDGb: 0.35  
DEb: -17.7  
DGr: 16.0  
IP: 0.0  
LEDGF Binder: None

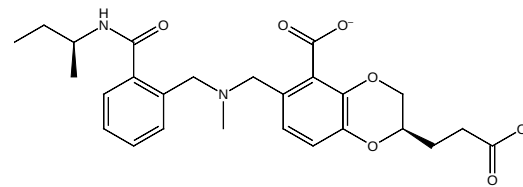

title: AVX38784\_7\_1  
FE: -1.7  
DGb: -2.2  
dDGb: 0.42  
DEb: -45.8  
DGr: 43.6  
IP: 0.5  
LEDGF Binder: None

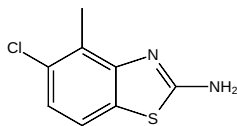

title: AVX15988\_0  
FE: -1.6  
DGb: -1.6  
dDGb: 0.12  
DEb: -13.4  
DGr: 11.8  
IP: 0.0  
LEDGF Binder: None

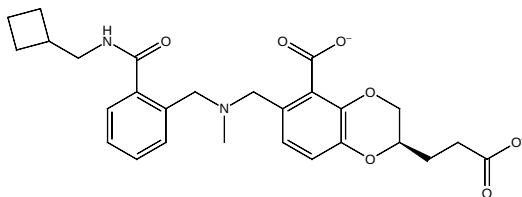

title: AVX38788\_2\_1  
FE: -1.5  
DGb: -2.0  
dDGb: 0.15  
DEb: -40.0  
DGr: 38.0  
IP: 0.5  
LEDGF Binder: None

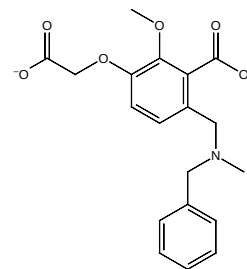

title: AVX40915\_1\_1  
FE: -1.5  
DGb: -2.2  
dDGb: 0.4  
DEb: -38.2  
DGr: 36.0  
IP: 0.7  
LEDGF Binder: None

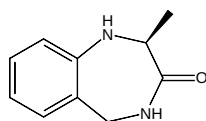

title: AVX17261\_0\_1  
FE: -1.5  
DGb: -1.5  
dDGb: 0.04  
DEb: -19.1  
DGr: 17.6  
IP: 0.0  
LEDGF Binder: None

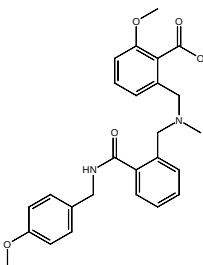

title: AVX101122\_0\_1  
FE: -1.5  
DGb: -1.9  
dDGb: 0.15  
DEb: -43.1  
DGr: 41.2  
IP: 0.5  
LEDGF Binder: None

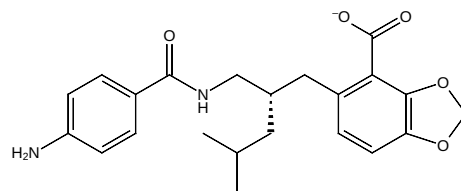

title: GL5243106\_0  
FE: -1.4  
DGb: -1.4  
dDGb: 0.82  
DEb: -36.6  
DGr: 35.2  
IP: 0.0  
LEDGF Binder: 1

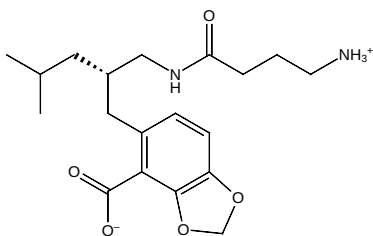

title: AVX17560\_0  
FE: -1.3  
DGb: -1.3  
dDGb: 0.29  
DEb: -36.0  
DGr: 34.7  
IP: 0.0  
LEDGF Binder: 1

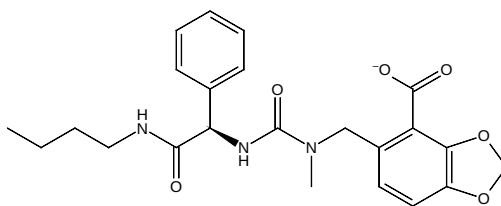

title: AVX38673\_0  
FE: -1.3  
DGb: -1.3  
dDGb: 0.47  
DEb: -41.7  
DGr: 40.4  
IP: 0.0  
LEDGF Binder: None

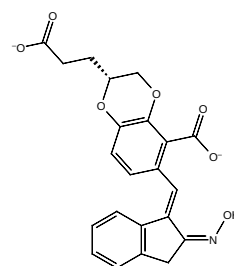

title: AVX38742\_7  
FE: -1.3  
DGb: -1.3  
dDGb: 0.08  
DEb: -39.5  
DGr: 38.2  
IP: 0.0  
LEDGF Binder: None

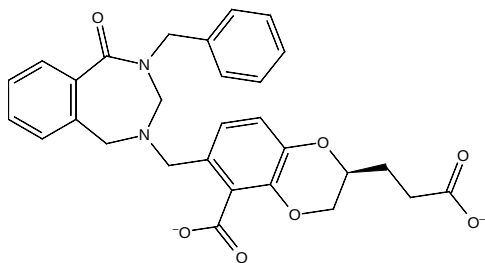

title: AVX38741\_1\_1

FE: -1.3  
DGb: -1.3  
dDGb: 0.34  
DEb: -40.0  
DGr: 38.7  
IP: 0.0  
LEDGF Binder: 1

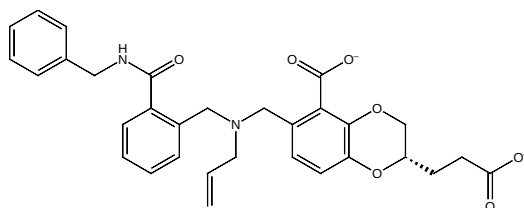

title: AVX38753\_1\_1

FE: -1.2  
DGb: -1.7  
dDGb: 0.1  
DEb: -47.6  
DGr: 45.9  
IP: 0.5  
LEDGF Binder: None

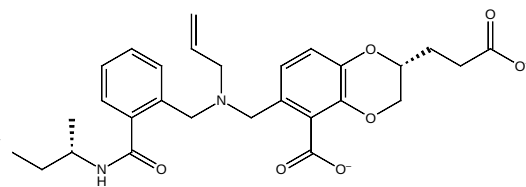

title: AVX38779\_5\_1

FE: -1.2  
DGb: -1.7  
dDGb: 0.41  
DEb: -40.2  
DGr: 38.6  
IP: 0.5  
LEDGF Binder: None

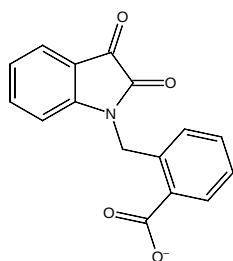

title: AVX16984\_0

FE: -1.0  
DGb: -1.0  
dDGb: 0.09  
DEb: -35.4  
DGr: 34.4  
IP: 0.0  
LEDGF Binder: None

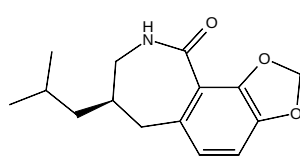

title: AVX17544\_1

FE: -1.0  
DGb: -1.0  
dDGb: 0.18  
DEb: -21.0  
DGr: 20.1  
IP: 0.0  
LEDGF Binder: None

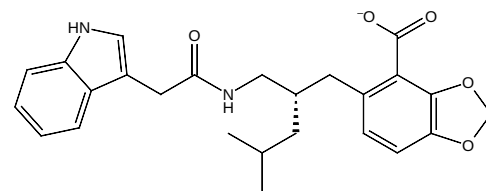

title: AVX40812\_0

FE: -0.9  
DGb: -0.9  
dDGb: 0.74  
DEb: -36.6  
DGr: 35.7  
IP: 0.0  
LEDGF Binder: 1

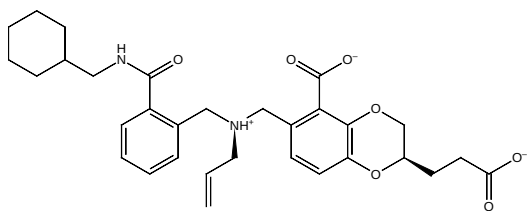

title: AVX38781\_2

FE: -0.9  
DGb: -1.2  
dDGb: 0.1  
DEb: -40.0  
DGr: 38.8  
IP: 0.3  
LEDGF Binder: None

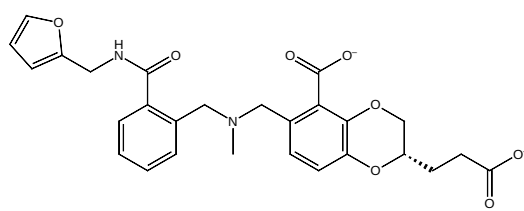

title: AVX38789\_1\_1

FE: -0.8  
DGb: -1.3  
dDGb: 0.31  
DEb: -47.3  
DGr: 46.0  
IP: 0.5  
LEDGF Binder: 1

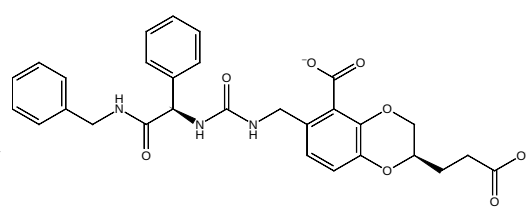

title: AVX17734\_0

FE: -0.8  
DGb: -0.8  
dDGb: 0.26  
DEb: -46.7  
DGr: 46.0  
IP: 0.0  
LEDGF Binder: None

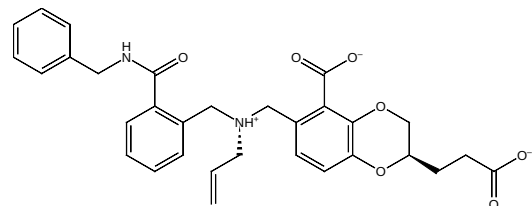

title: AVX38753\_3  
FE: -0.7  
DGb: -1.0  
dDGb: 0.08  
DEb: -43.0  
DGr: 42.0  
IP: 0.3  
LEDGF Binder: None

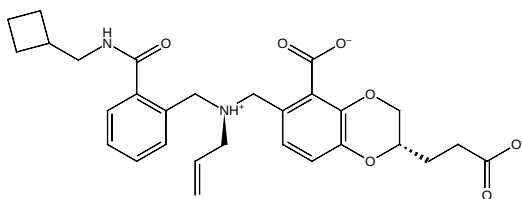

title: AVX38782\_0  
FE: -0.7  
DGb: -1.0  
dDGb: 0.43  
DEb: -50.8  
DGr: 49.8  
IP: 0.3  
LEDGF Binder: None

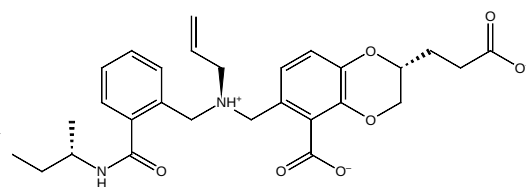

title: AVX38779\_5  
FE: -0.6  
DGb: -1.0  
dDGb: 0.24  
DEb: -38.7  
DGr: 37.7  
IP: 0.3  
LEDGF Binder: None

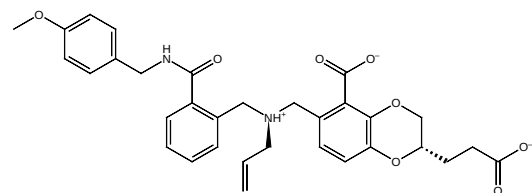

title: AVX38780\_1  
FE: -0.6  
DGb: -1.0  
dDGb: 0.15  
DEb: -42.3  
DGr: 41.4  
IP: 0.3  
LEDGF Binder: None

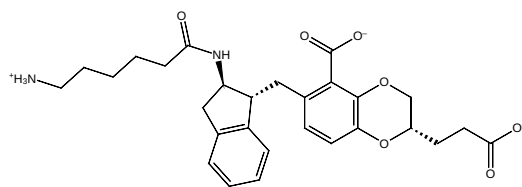

title: AVX38747\_1  
FE: -0.6  
DGb: -0.6  
dDGb: 0.58  
DEb: -39.7  
DGr: 39.1  
IP: 0.0  
LEDGF Binder: None

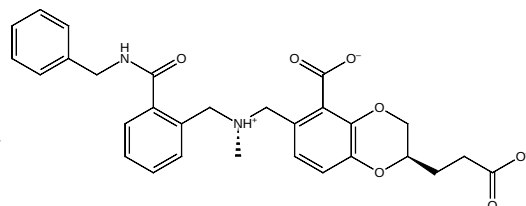

title: AVX38785\_1  
FE: -0.6  
DGb: -0.9  
dDGb: 0.63  
DEb: -45.1  
DGr: 44.2  
IP: 0.3  
LEDGF Binder: None

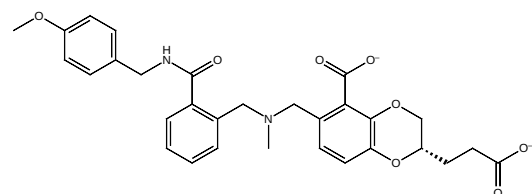

title: AVX38786\_0\_1  
FE: -0.6  
DGb: -1.1  
dDGb: 0.24  
DEb: -48.9  
DGr: 47.9  
IP: 0.5  
LEDGF Binder: None

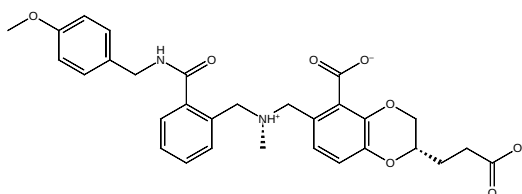

title: AVX38786\_1  
FE: -0.5  
DGb: -0.9  
dDGb: 0.32  
DEb: -43.2  
DGr: 42.4  
IP: 0.3  
LEDGF Binder: None

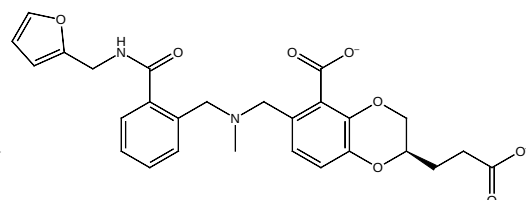

title: AVX38789\_3\_1  
FE: -0.4  
DGb: -0.9  
dDGb: 1.41  
DEb: -43.0  
DGr: 42.1  
IP: 0.5  
LEDGF Binder: None

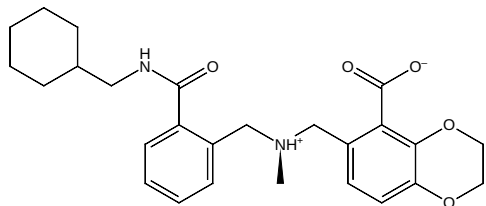

title: AVX101118\_0  
 FE: -0.4  
 DGb: -0.7  
 dDGb: 0.08  
 DEb: -36.4  
 DGr: 35.7  
 IP: 0.3  
 LEDGF Binder: None

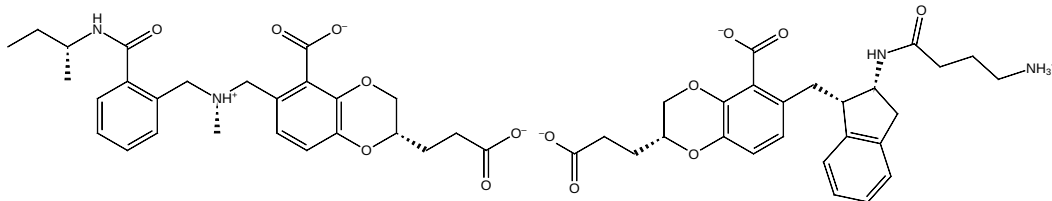

title: AVX38784\_0  
 FE: -0.2  
 DGb: -0.6  
 dDGb: 0.32  
 DEb: -34.8  
 DGr: 34.3  
 IP: 0.3  
 LEDGF Binder: None

title: AVX38749\_7  
 FE: -0.2  
 DGb: -0.2  
 dDGb: 0.68  
 DEb: -39.4  
 DGr: 39.2  
 IP: 0.0  
 LEDGF Binder: None

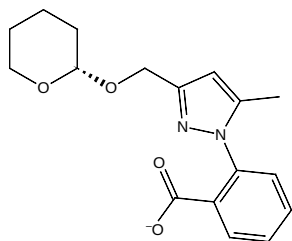

title: AVX17288\_1  
 FE: -0.1  
 DGb: -0.1  
 dDGb: 0.45  
 DEb: -33.0  
 DGr: 32.9  
 IP: 0.0  
 LEDGF Binder: None

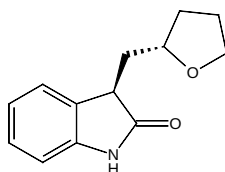

title: AVX62525\_1  
 FE: -0.1  
 DGb: -0.1  
 dDGb: 0.42  
 DEb: -16.1  
 DGr: 16.0  
 IP: 0.0  
 LEDGF Binder: None

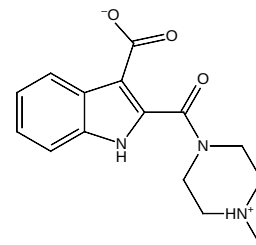

title: AVX17478\_0  
 FE: -0.1  
 DGb: -0.8  
 dDGb: 0.72  
 DEb: -30.2  
 DGr: 29.4  
 IP: 0.7  
 LEDGF Binder: None

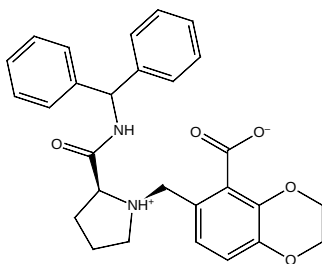

title: AVX62808\_1  
 FE: -0.1  
 DGb: -0.1  
 dDGb: 0.34  
 DEb: -33.8  
 DGr: 33.6  
 IP: 0.1  
 LEDGF Binder: None

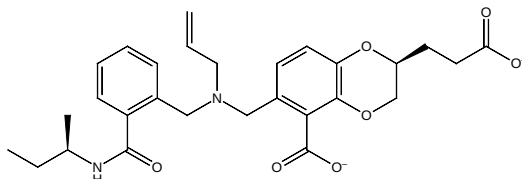

title: AVX38779\_0\_1  
 FE: -0.0  
 DGb: -0.6  
 dDGb: 0.21  
 DEb: -39.1  
 DGr: 38.6  
 IP: 0.5  
 LEDGF Binder: 1

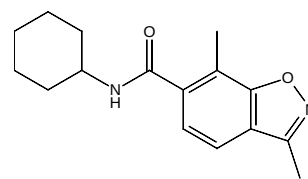

title: AVX38710\_0  
 FE: -0.0  
 DGb: -0.0  
 dDGb: 0.24  
 DEb: -18.4  
 DGr: 18.4  
 IP: 0.0  
 LEDGF Binder: None

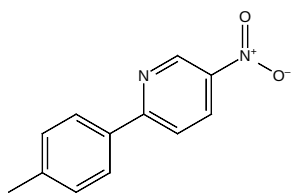

title: AVX17233\_0  
FE: 0.0  
DGb: 0.0  
dDGb: 0.08  
DEb: -13.2  
DGr: 13.2  
IP: 0.0  
LEDGF Binder: None

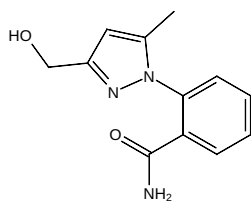

title: AVX17378\_0  
FE: 0.0  
DGb: 0.0  
dDGb: 0.2  
DEb: -20.1  
DGr: 20.1  
IP: 0.0  
LEDGF Binder: None

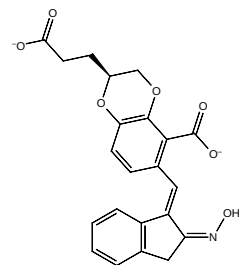

title: AVX38742\_3  
FE: 0.1  
DGb: 0.1  
dDGb: 1.32  
DEb: -41.9  
DGr: 42.0  
IP: 0.0  
LEDGF Binder: 1

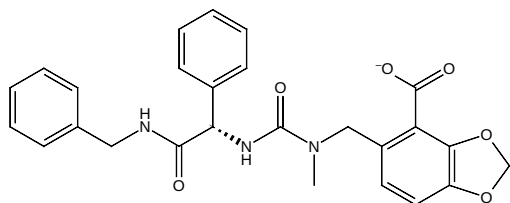

title: AVX38674\_0  
FE: 0.1  
DGb: 0.1  
dDGb: 0.1  
DEb: -43.0  
DGr: 43.1  
IP: 0.0  
LEDGF Binder: 1

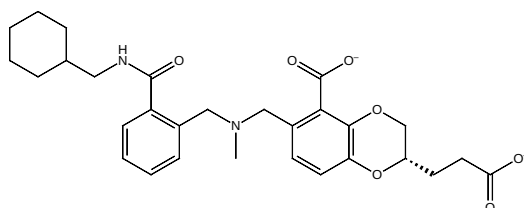

title: AVX38787\_0\_1  
FE: 0.2  
DGb: -0.3  
dDGb: 0.39  
DEb: -38.2  
DGr: 37.8  
IP: 0.5  
LEDGF Binder: None

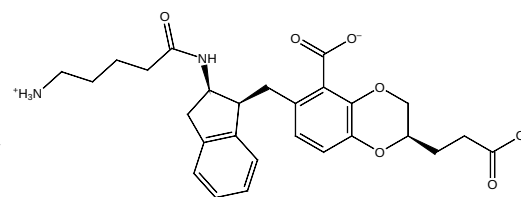

title: AVX38748\_7  
FE: 0.2  
DGb: 0.2  
dDGb: 0.59  
DEb: -47.2  
DGr: 47.4  
IP: 0.0  
LEDGF Binder: None

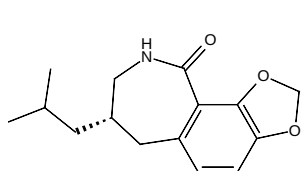

title: AVX17544\_0  
FE: 0.2  
DGb: 0.2  
dDGb: 0.14  
DEb: -17.9  
DGr: 18.1  
IP: 0.0  
LEDGF Binder: None

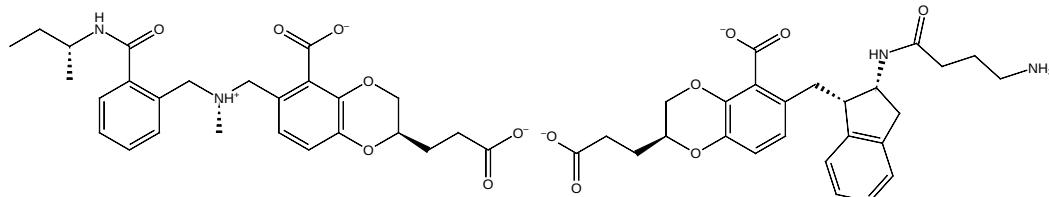

title: AVX38784\_4  
FE: 0.2  
DGb: -0.1  
dDGb: 0.43  
DEb: -42.4  
DGr: 42.3  
IP: 0.3  
LEDGF Binder: None

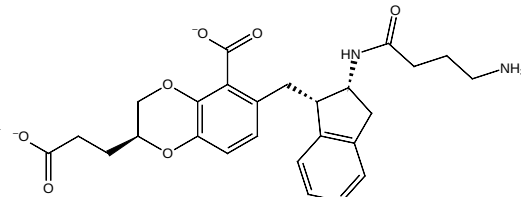

title: AVX38749\_3  
FE: 0.2  
DGb: 0.2  
dDGb: 0.43  
DEb: -37.7  
DGr: 37.9  
IP: 0.0  
LEDGF Binder: None



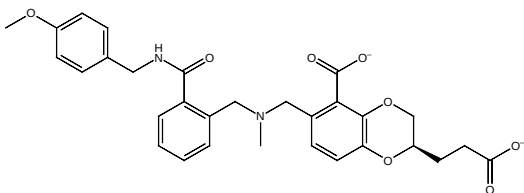

title: AVX38786\_3\_1  
FE: 0.2  
DGb: -0.3  
dDGb: 0.45  
DEb: -37.8  
DGr: 37.5  
IP: 0.5  
LEDGF Binder: None

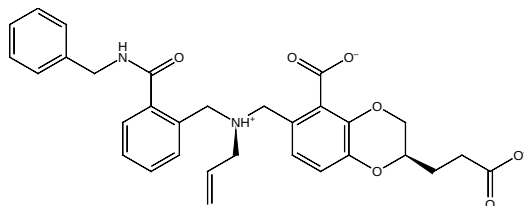

title: AVX38753\_2  
FE: 0.2  
DGb: -0.1  
dDGb: 0.68  
DEb: -40.9  
DGr: 40.8  
IP: 0.3  
LEDGF Binder: None

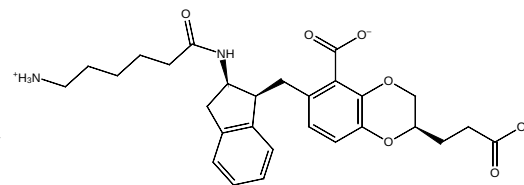

title: AVX38747\_7  
FE: 0.3  
DGb: 0.3  
dDGb: 0.33  
DEb: -46.0  
DGr: 46.3  
IP: 0.0  
LEDGF Binder: None

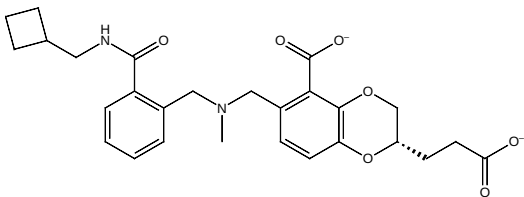

title: AVX38788\_0\_1  
FE: 0.3  
DGb: -0.2  
dDGb: 0.29  
DEb: -35.0  
DGr: 34.8  
IP: 0.5  
LEDGF Binder: None

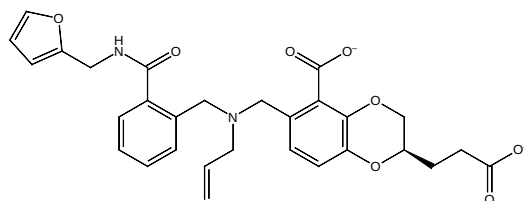

title: AVX38783\_3\_1  
FE: 0.3  
DGb: -0.2  
dDGb: 0.43  
DEb: -42.9  
DGr: 42.7  
IP: 0.5  
LEDGF Binder: None

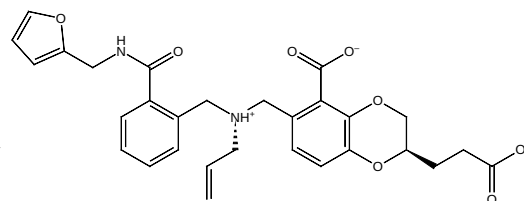

title: AVX38783\_3  
FE: 0.3  
DGb: -0.0  
dDGb: 0.76  
DEb: -42.2  
DGr: 42.2  
IP: 0.3  
LEDGF Binder: None

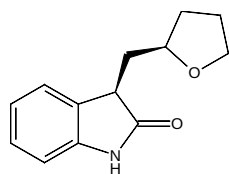

title: AVX62525\_3  
FE: 0.3  
DGb: 0.3  
dDGb: 0.09  
DEb: -14.9  
DGr: 15.2  
IP: 0.0  
LEDGF Binder: None

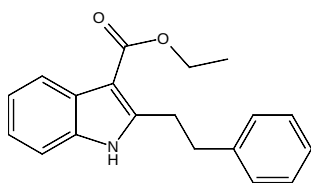

title: AVX17370\_0  
FE: 0.4  
DGb: 0.4  
dDGb: 0.91  
DEb: -18.4  
DGr: 18.7  
IP: 0.0  
LEDGF Binder: None

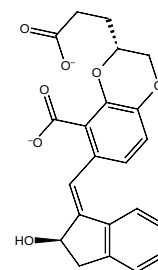

title: AVX38743\_3  
FE: 0.5  
DGb: 0.5  
dDGb: 0.72  
DEb: -44.9  
DGr: 45.4  
IP: 0.0  
LEDGF Binder: None

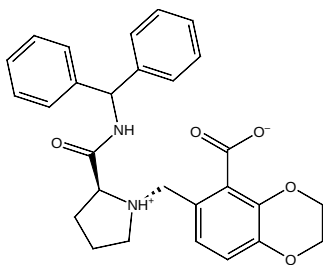

title: AVX62808\_0  
FE: 0.5  
DGb: 0.4  
dDGb: 0.58  
DEb: -35.0  
DGr: 35.4  
IP: 0.1  
LEDGF Binder: None

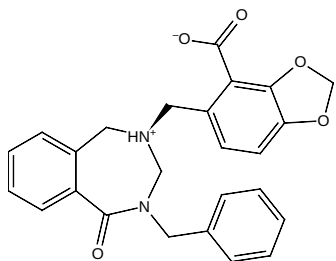

title: AVX17684\_1  
FE: 0.5  
DGb: -1.0  
dDGb: 0.36  
DEb: -32.9  
DGr: 31.9  
IP: 1.5  
LEDGF Binder: None

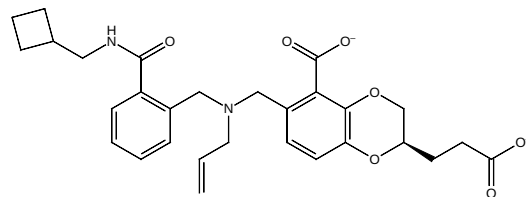

title: AVX38782\_2\_1  
FE: 0.5  
DGb: 0.0  
dDGb: 0.03  
DEb: -44.1  
DGr: 44.2  
IP: 0.5  
LEDGF Binder: None

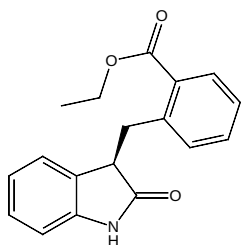

title: AVX17267\_1  
FE: 0.6  
DGb: 0.6  
dDGb: 0.11  
DEb: -20.1  
DGr: 20.7  
IP: 0.0  
LEDGF Binder: None

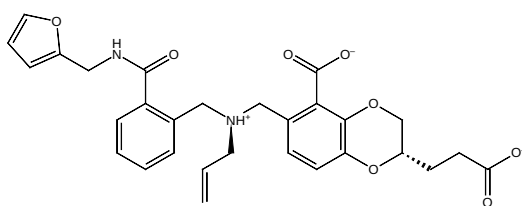

title: AVX38783\_0  
FE: 0.7  
DGb: 0.4  
dDGb: 0.99  
DEb: -38.5  
DGr: 38.9  
IP: 0.3  
LEDGF Binder: None

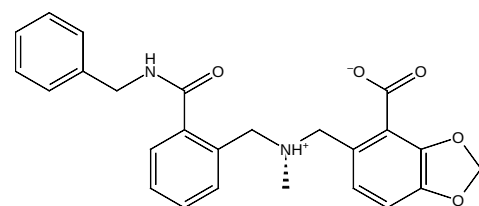

title: AVX38708\_1  
FE: 0.7  
DGb: 0.4  
dDGb: 0.34  
DEb: -31.4  
DGr: 31.8  
IP: 0.3  
LEDGF Binder: None

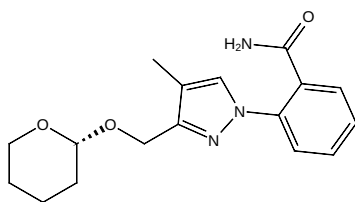

title: AVX17384\_0  
FE: 0.9  
DGb: 0.9  
dDGb: 0.13  
DEb: -22.2  
DGr: 23.1  
IP: 0.0  
LEDGF Binder: None

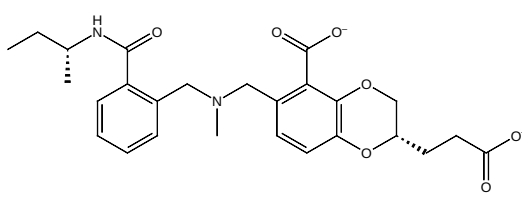

title: AVX38784\_0\_1  
FE: 0.9  
DGb: 0.4  
dDGb: 0.0  
DEb: -37.0  
DGr: 37.5  
IP: 0.5  
LEDGF Binder: None

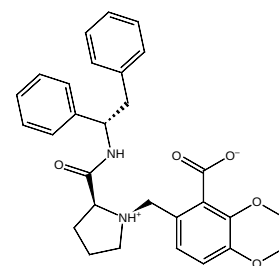

title: AVX62807\_1  
FE: 1.0  
DGb: 0.9  
dDGb: 0.39  
DEb: -32.1  
DGr: 33.0  
IP: 0.1  
LEDGF Binder: None

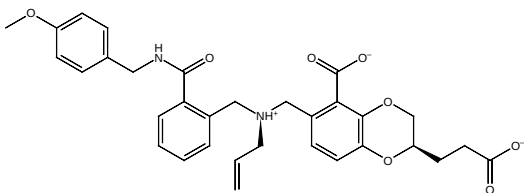

title: AVX38780\_3  
FE: 1.0  
DGb: 0.7  
dDGb: 0.85  
DEb: -41.0  
DGr: 41.7  
IP: 0.3  
LEDGF Binder: None

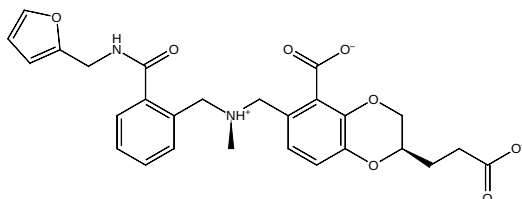

title: AVX38789\_2  
FE: 1.0  
DGb: 0.7  
dDGb: 0.21  
DEb: -37.0  
DGr: 37.6  
IP: 0.3  
LEDGF Binder: None

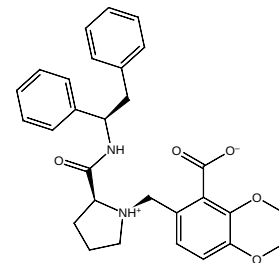

title: AVX62807\_3  
FE: 1.1  
DGb: 1.0  
dDGb: 0.24  
DEb: -32.7  
DGr: 33.7  
IP: 0.1  
LEDGF Binder: None

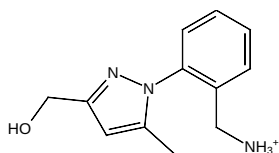

title: AVX17379\_0  
FE: 1.1  
DGb: 1.0  
dDGb: 0.83  
DEb: -20.6  
DGr: 21.6  
IP: 0.1  
LEDGF Binder: 1

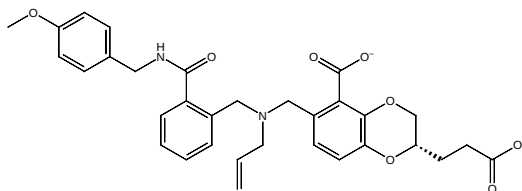

title: AVX38780\_0\_1  
FE: 1.2  
DGb: 0.7  
dDGb: 0.27  
DEb: -39.2  
DGr: 39.9  
IP: 0.5  
LEDGF Binder: 1

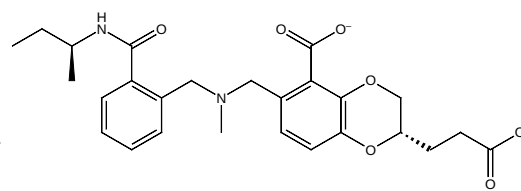

title: AVX38784\_3\_1  
FE: 1.3  
DGb: 0.8  
dDGb: 0.09  
DEb: -40.6  
DGr: 41.4  
IP: 0.5  
LEDGF Binder: None

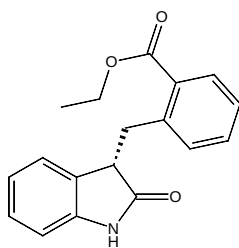

title: AVX17267\_0  
FE: 1.5  
DGb: 1.5  
dDGb: 0.77  
DEb: -15.0  
DGr: 16.5  
IP: 0.0  
LEDGF Binder: None

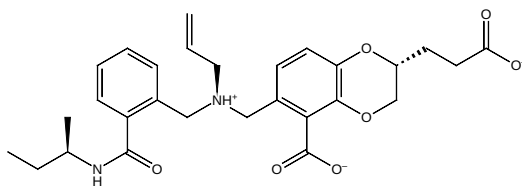

title: AVX38779\_4  
FE: 1.6  
DGb: 1.3  
dDGb: 1.22  
DEb: -41.0  
DGr: 42.3  
IP: 0.3  
LEDGF Binder: None

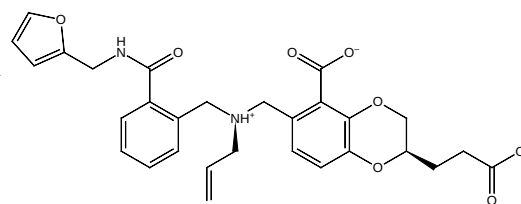

title: AVX38783\_2  
FE: 1.6  
DGb: 1.3  
dDGb: 0.26  
DEb: -35.3  
DGr: 36.6  
IP: 0.3  
LEDGF Binder: None

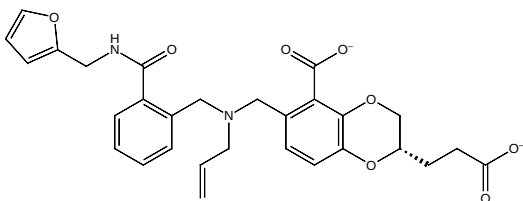

title: AVX38783\_1\_1

FE: 1.8  
DGb: 1.3  
dDGb: 0.13  
DEb: -43.1  
DGr: 44.3  
IP: 0.5  
LEDGF Binder: 1

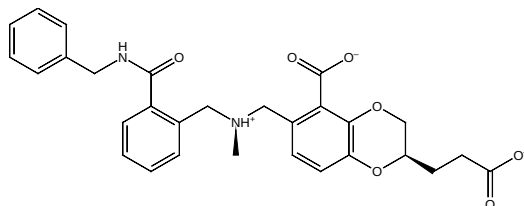

title: AVX38785\_2

FE: 1.8  
DGb: 1.4  
dDGb: 0.16  
DEb: -37.6  
DGr: 39.0  
IP: 0.3  
LEDGF Binder: None

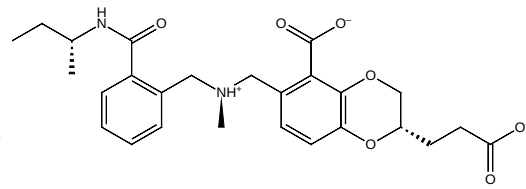

title: AVX38784\_2

FE: 1.9  
DGb: 1.6  
dDGb: 0.31  
DEb: -34.2  
DGr: 35.8  
IP: 0.3  
LEDGF Binder: None

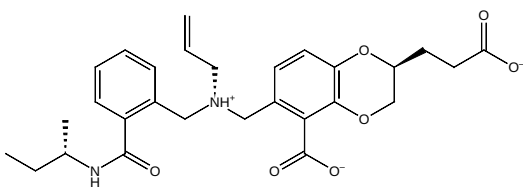

title: AVX38779\_3

FE: 2.1  
DGb: 1.8  
dDGb: 0.07  
DEb: -31.8  
DGr: 33.6  
IP: 0.3  
LEDGF Binder: None

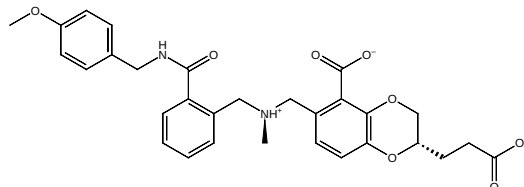

title: AVX38786\_0

FE: 2.2  
DGb: 1.8  
dDGb: 0.23  
DEb: -34.5  
DGr: 36.3  
IP: 0.3  
LEDGF Binder: None

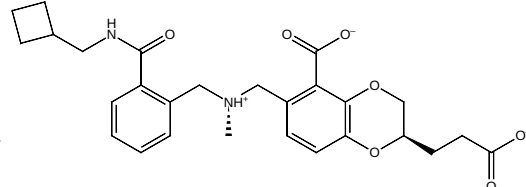

title: AVX38788\_3

FE: 2.2  
DGb: 1.9  
dDGb: 0.64  
DEb: -36.2  
DGr: 38.1  
IP: 0.3  
LEDGF Binder: None

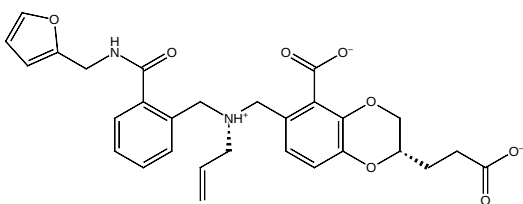

title: AVX38783\_1

FE: 2.2  
DGb: 1.9  
dDGb: 0.47  
DEb: -40.9  
DGr: 42.8  
IP: 0.3  
LEDGF Binder: None

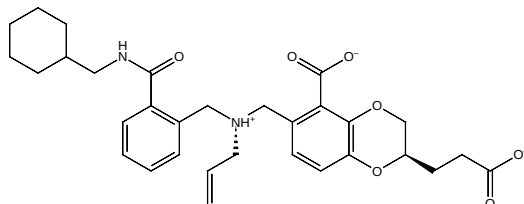

title: AVX38781\_3

FE: 2.3  
DGb: 2.0  
dDGb: 0.15  
DEb: -33.2  
DGr: 35.2  
IP: 0.3  
LEDGF Binder: None

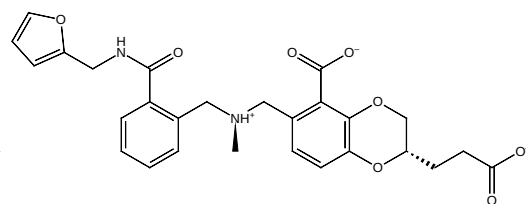

title: AVX38789\_0

FE: 2.4  
DGb: 2.1  
dDGb: 0.45  
DEb: -42.7  
DGr: 44.8  
IP: 0.3  
LEDGF Binder: None

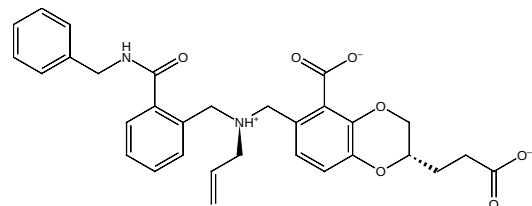

title: AVX38753\_0  
FE: 2.4  
DGb: 2.1  
dDGb: 0.14  
DEb: -37.4  
DGr: 39.5  
IP: 0.3  
LEDGF Binder: None

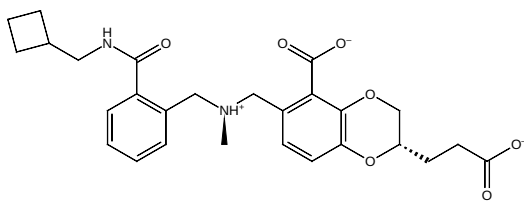

title: AVX38788\_0  
FE: 2.5  
DGb: 2.2  
dDGb: 0.3  
DEb: -34.6  
DGr: 36.8  
IP: 0.3  
LEDGF Binder: None

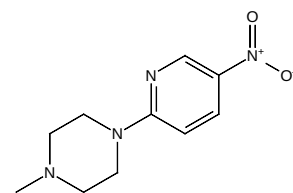

title: AVX17228\_0\_2  
FE: 2.6  
DGb: 1.6  
dDGb: 0.27  
DEb: -12.0  
DGr: 13.6  
IP: 1.0  
LEDGF Binder: None

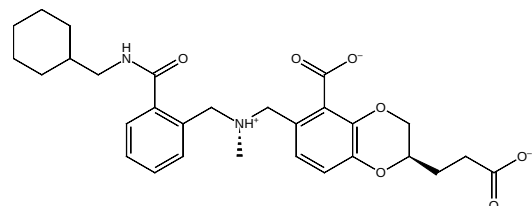

title: AVX38787\_3  
FE: 2.6  
DGb: 2.3  
dDGb: 0.4  
DEb: -37.3  
DGr: 39.6  
IP: 0.3  
LEDGF Binder: None

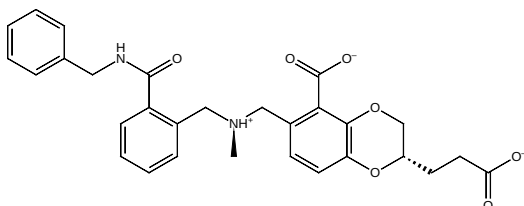

title: AVX38785\_0  
FE: 2.7  
DGb: 2.4  
dDGb: 0.24  
DEb: -42.0  
DGr: 44.4  
IP: 0.3  
LEDGF Binder: None

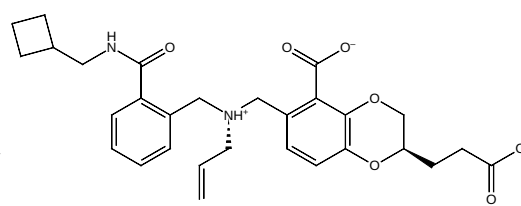

title: AVX38782\_3  
FE: 2.8  
DGb: 2.5  
dDGb: 0.18  
DEb: -35.6  
DGr: 38.1  
IP: 0.3  
LEDGF Binder: None

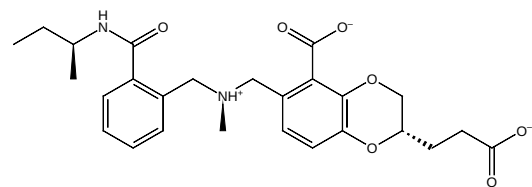

title: AVX38784\_3  
FE: 2.9  
DGb: 2.6  
dDGb: 0.57  
DEb: -37.7  
DGr: 40.3  
IP: 0.3  
LEDGF Binder: None

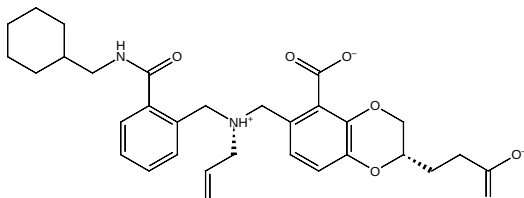

title: AVX38781\_1  
FE: 3.0  
DGb: 2.6  
dDGb: 0.12  
DEb: -35.6  
DGr: 38.2  
IP: 0.3  
LEDGF Binder: None

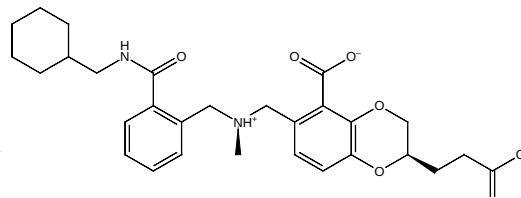

title: AVX38787\_2  
FE: 3.0  
DGb: 2.6  
dDGb: 0.98  
DEb: -42.1  
DGr: 44.7  
IP: 0.3  
LEDGF Binder: None

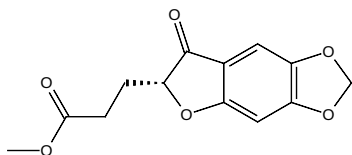

title: AVX17280\_1  
FE: 3.1  
DGb: 3.1  
dDGb: 0.28  
DEb: -13.3  
DGr: 16.4  
IP: 0.0  
LEDGF Binder: None

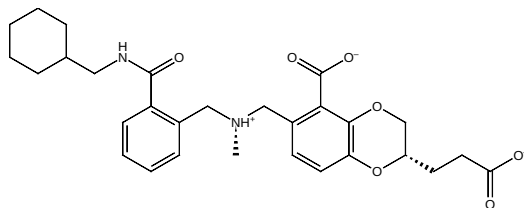

title: AVX38787\_1  
FE: 3.2  
DGb: 2.9  
dDGb: 0.14  
DEb: -32.5  
DGr: 35.4  
IP: 0.3  
LEDGF Binder: 1

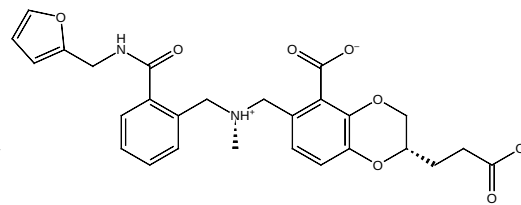

title: AVX38789\_1  
FE: 3.3  
DGb: 2.9  
dDGb: 0.33  
DEb: -36.5  
DGr: 39.4  
IP: 0.3  
LEDGF Binder: None

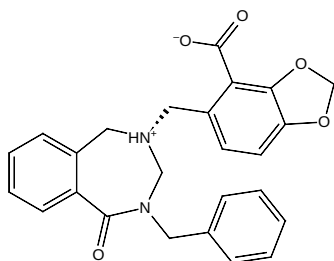

title: AVX17684\_0  
FE: 3.3  
DGb: 1.7  
dDGb: 0.38  
DEb: -32.4  
DGr: 34.2  
IP: 1.5  
LEDGF Binder: None

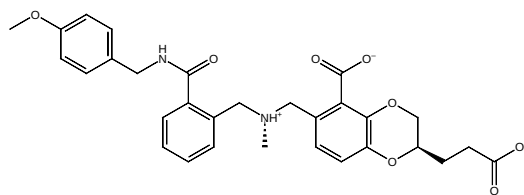

title: AVX38786\_3  
FE: 3.3  
DGb: 2.9  
dDGb: 0.41  
DEb: -45.9  
DGr: 48.9  
IP: 0.3  
LEDGF Binder: None

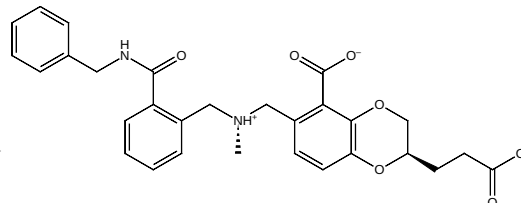

title: AVX38785\_3  
FE: 3.4  
DGb: 3.1  
dDGb: 0.41  
DEb: -40.2  
DGr: 43.3  
IP: 0.3  
LEDGF Binder: None

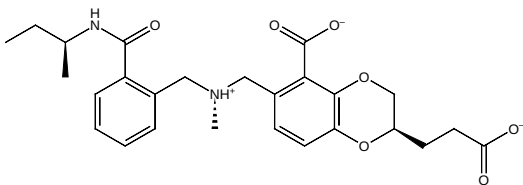

title: AVX38784\_5  
FE: 3.5  
DGb: 3.2  
dDGb: 0.1  
DEb: -38.6  
DGr: 41.8  
IP: 0.3  
LEDGF Binder: 1

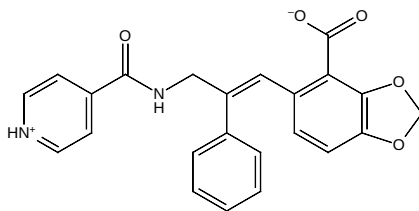

title: AVX101125\_0  
FE: 3.5  
DGb: -1.3  
dDGb: 0.38  
DEb: -36.3  
DGr: 34.9  
IP: 4.9  
LEDGF Binder: None

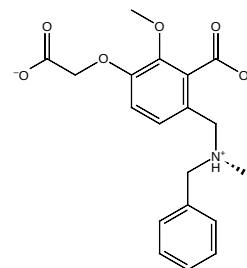

title: AVX40915\_1  
FE: 3.7  
DGb: 3.5  
dDGb: 0.46  
DEb: -36.8  
DGr: 40.3  
IP: 0.2  
LEDGF Binder: None

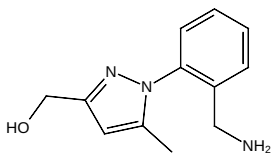

title: AVX17379\_0\_1  
 FE: 3.9  
 DGb: 2.5  
 dDGB: 0.29  
 DEb: -13.5  
 DGr: 16.0  
 IP: 1.4  
 LEDGF Binder: None

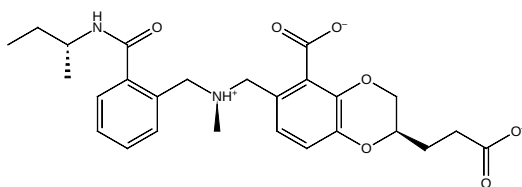

title: AVX38784\_6  
 FE: 4.0  
 DGb: 3.7  
 dDGB: 0.05  
 DEb: -47.1  
 DGr: 50.8  
 IP: 0.3  
 LEDGF Binder: None

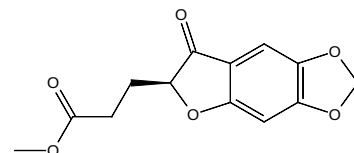

title: AVX17280\_0  
 FE: 4.2  
 DGb: 4.2  
 dDGB: 0.15  
 DEb: -10.5  
 DGr: 14.6  
 IP: 0.0  
 LEDGF Binder: None

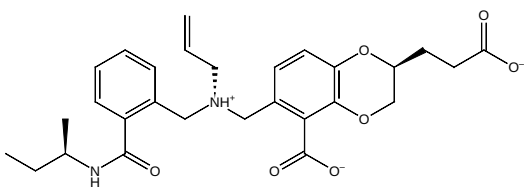

title: AVX38779\_2  
 FE: 4.2  
 DGb: 3.9  
 dDGB: 0.13  
 DEb: -31.0  
 DGr: 34.9  
 IP: 0.3  
 LEDGF Binder: None

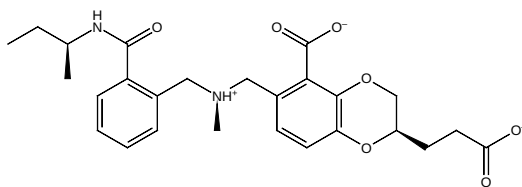

title: AVX38784\_7  
 FE: 4.4  
 DGb: 4.1  
 dDGB: 0.63  
 DEb: -37.8  
 DGr: 41.8  
 IP: 0.3  
 LEDGF Binder: None

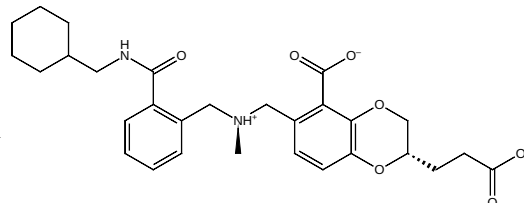

title: AVX38787\_0  
 FE: 4.5  
 DGb: 4.2  
 dDGB: 0.59  
 DEb: -32.1  
 DGr: 36.3  
 IP: 0.3  
 LEDGF Binder: None

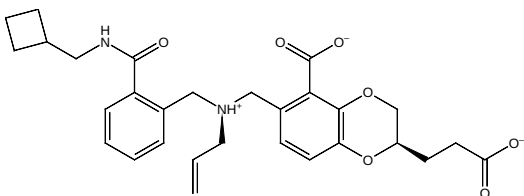

title: AVX38782\_2  
 FE: 4.5  
 DGb: 4.2  
 dDGB: 0.39  
 DEb: -35.1  
 DGr: 39.3  
 IP: 0.3  
 LEDGF Binder: None

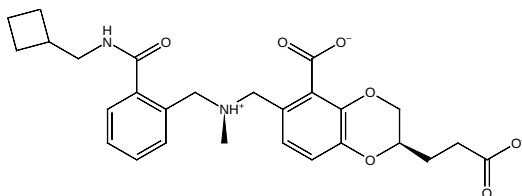

title: AVX38788\_2  
 FE: 4.7  
 DGb: 4.4  
 dDGB: 0.49  
 DEb: -34.5  
 DGr: 38.8  
 IP: 0.3  
 LEDGF Binder: None

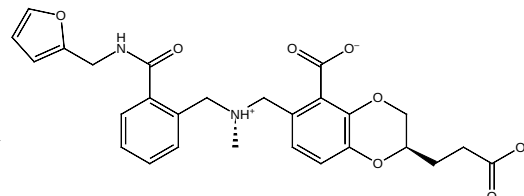

title: AVX38789\_3  
 FE: 4.7  
 DGb: 4.4  
 dDGB: 1.55  
 DEb: -36.2  
 DGr: 40.5  
 IP: 0.3  
 LEDGF Binder: None

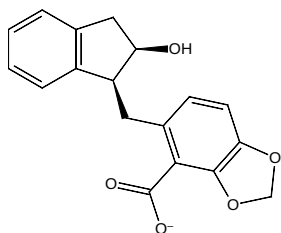

title: AVX17375\_3  
FE: None  
DGb: None  
dDGb: 0.0  
DEb: None  
DGr: None  
IP: 0.0  
LEDGF Binder: None

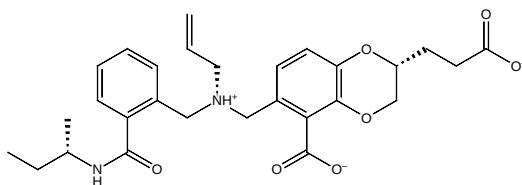

title: AVX38779\_7  
FE: None  
DGb: None  
dDGb: 0.0  
DEb: None  
DGr: None  
IP: 0.3  
LEDGF Binder: None

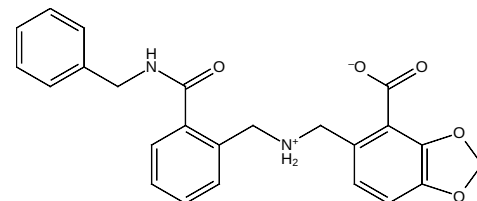

title: AVX17684m\_0  
FE: None  
DGb: None  
dDGb: 0.0  
DEb: None  
DGr: None  
IP: 0.2  
LEDGF Binder: None

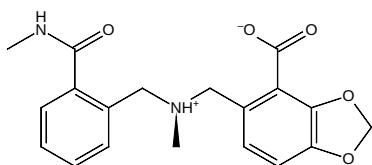

title: AVX38705\_1  
FE: None  
DGb: None  
dDGb: 0.0  
DEb: None  
DGr: None  
IP: 0.3  
LEDGF Binder: None

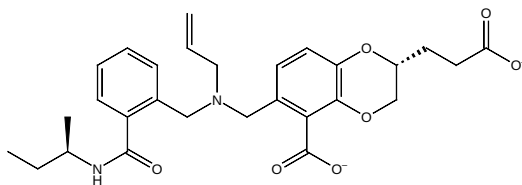

title: AVX38779\_6\_1  
FE: None  
DGb: None  
dDGb: 0.0  
DEb: None  
DGr: None  
IP: 0.5  
LEDGF Binder: None

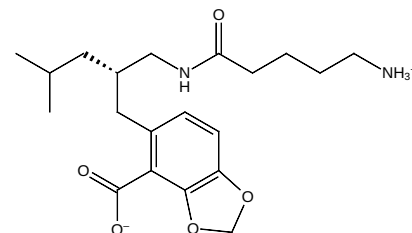

title: AVX17542\_0  
FE: None  
DGb: None  
dDGb: 0.0  
DEb: None  
DGr: None  
IP: 0.0  
LEDGF Binder: 1

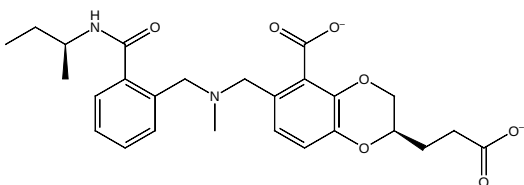

title: AVX38784\_5\_1  
FE: None  
DGb: None  
dDGb: 0.0  
DEb: None  
DGr: None  
IP: 0.5  
LEDGF Binder: None

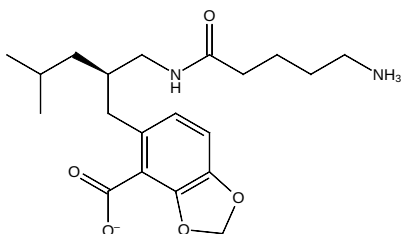

title: AVX17542\_1  
FE: None  
DGb: None  
dDGb: 0.0  
DEb: None  
DGr: None  
IP: 0.0  
LEDGF Binder: None

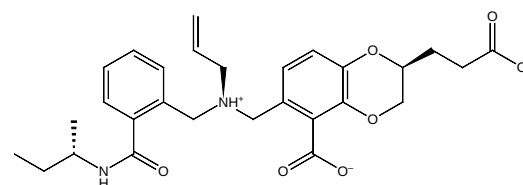

title: AVX38779\_1  
FE: None  
DGb: None  
dDGb: 0.0  
DEb: None  
DGr: None  
IP: 0.3  
LEDGF Binder: None



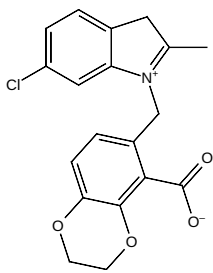

title: AVX40871\_0\_1  
FE: None  
DGb: None  
dDGb: 0.0  
DEb: None  
DGr: None  
IP: 0.1  
LEDGF Binder: None

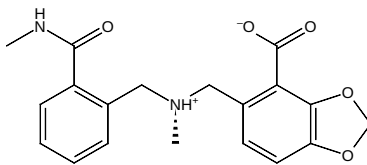

title: AVX38705\_0  
FE: None  
DGb: None  
dDGb: 0.0  
DEb: None  
DGr: None  
IP: 0.3  
LEDGF Binder: None

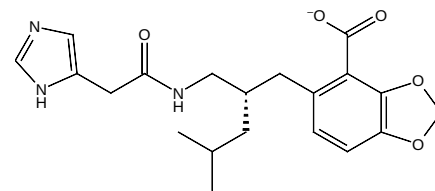

title: GL5243102\_0\_2  
FE: None  
DGb: None  
dDGb: 0.0  
DEb: None  
DGr: None  
IP: 0.3  
LEDGF Binder: 1

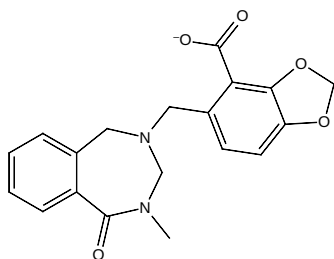

title: AVX17685\_1\_1  
FE: None  
DGb: None  
dDGb: 0.0  
DEb: None  
DGr: None  
IP: 0.1  
LEDGF Binder: None

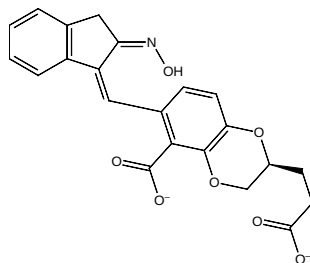

title: AVX38742\_1  
FE: None  
DGb: None  
dDGb: 0.0  
DEb: None  
DGr: None  
IP: 0.0  
LEDGF Binder: None

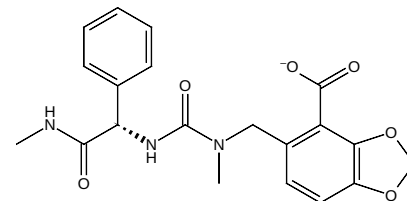

title: AVX38671\_0  
FE: None  
DGb: None  
dDGb: 0.0  
DEb: None  
DGr: None  
IP: 0.0  
LEDGF Binder: None

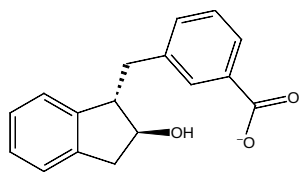

title: AVX17369\_1  
FE: None  
DGb: None  
dDGb: 0.0  
DEb: None  
DGr: None  
IP: 0.0  
LEDGF Binder: None

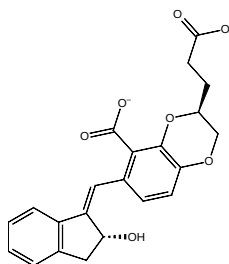

title: AVX38743\_6  
FE: None  
DGb: None  
dDGb: 0.0  
DEb: None  
DGr: None  
IP: 0.0  
LEDGF Binder: None

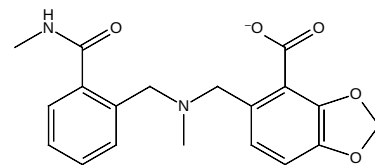

title: AVX38705\_1\_1  
FE: None  
DGb: None  
dDGb: 0.0  
DEb: None  
DGr: None  
IP: 0.5  
LEDGF Binder: None

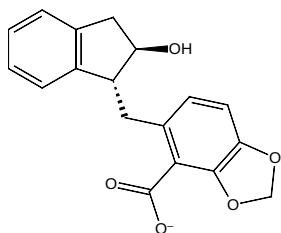

title: AVX17375\_1  
FE: None  
DGb: None  
dDGb: 0.0  
DEb: None  
DGr: None  
IP: 0.0  
LEDGF Binder: None

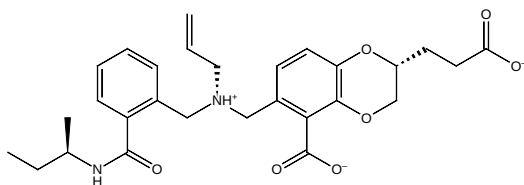

title: AVX38779\_6  
FE: None  
DGb: None  
dDGb: 0.0  
DEb: None  
DGr: None  
IP: 0.3  
LEDGF Binder: None



title: AVX40915\_0\_1  
FE: None  
DGb: None  
dDGb: 0.0  
DEb: None  
DGr: None  
IP: 0.7  
LEDGF Binder: None

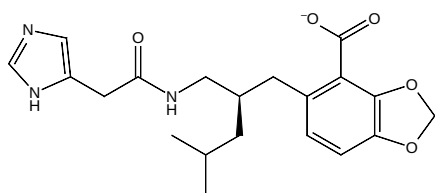

title: GL5243102\_1\_2  
FE: None  
DGb: None  
dDGb: 0.0  
DEb: None  
DGr: None  
IP: 0.3  
LEDGF Binder: None

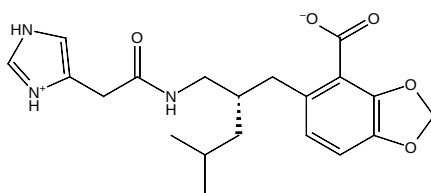

title: GL5243102\_0\_1  
FE: None  
DGb: None  
dDGb: 0.0  
DEb: None  
DGr: None  
IP: 1.4  
LEDGF Binder: None

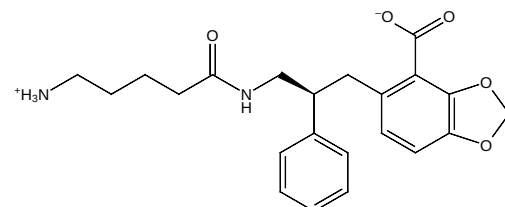

title: AVX101123\_0  
FE: None  
DGb: None  
dDGb: 0.0  
DEb: None  
DGr: None  
IP: 0.0  
LEDGF Binder: None

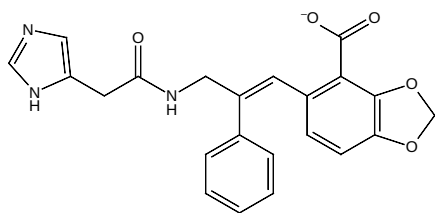

title: AVX62778\_0\_1  
FE: None  
DGb: None  
dDGb: 0.0  
DEb: None  
DGr: None  
IP: 0.3  
LEDGF Binder: None

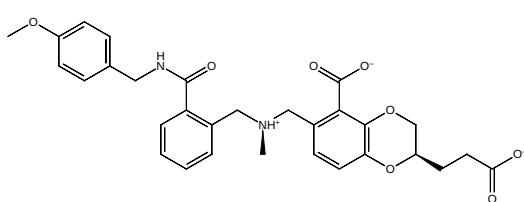

title: AVX38786\_2  
FE: None  
DGb: None  
dDGb: 0.0  
DEb: None  
DGr: None  
IP: 0.3  
LEDGF Binder: None

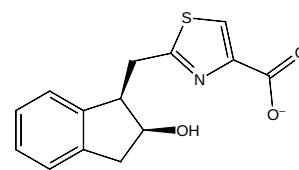

title: AVX17482\_3  
FE: None  
DGb: None  
dDGb: 0.0  
DEb: None  
DGr: None  
IP: 0.0  
LEDGF Binder: None

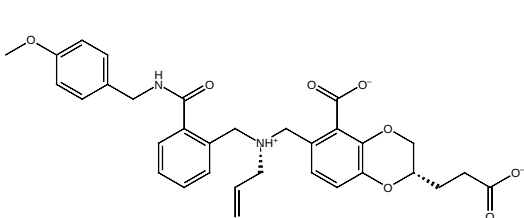

title: AVX38780\_0  
FE: None  
DGb: None  
dDGb: 0.0  
DEb: None  
DGr: None  
IP: 0.3  
LEDGF Binder: None

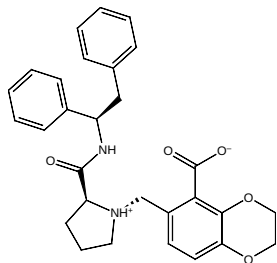

title: AVX62807\_2  
FE: None  
DGb: None  
dDGb: 0.0  
DEb: None  
DGr: None  
IP: 0.1  
LEDGF Binder: None

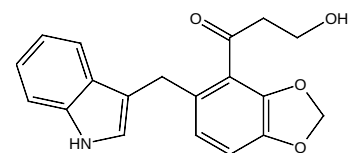

title: AVX17268\_0  
FE: None  
DGb: None  
dDGb: 0.0  
DEb: None  
DGr: None  
IP: 0.0  
LEDGF Binder: None

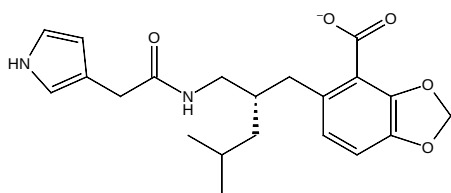

title: GL5243100\_0  
FE: None  
DGb: None  
dDGb: 0.0  
DEb: None  
DGr: None  
IP: 0.0  
LEDGF Binder: 1

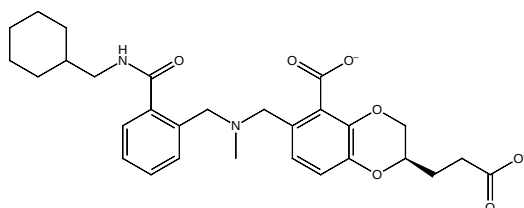

title: AVX38787\_2\_1  
FE: None  
DGb: None  
dDGb: 0.0  
DEb: None  
DGr: None  
IP: 0.5  
LEDGF Binder: None

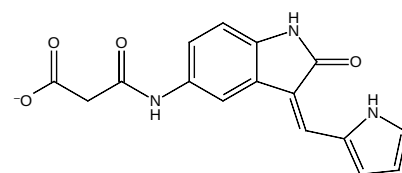

title: AVX62527\_0  
FE: None  
DGb: None  
dDGb: 0.0  
DEb: None  
DGr: None  
IP: 0.0  
LEDGF Binder: None

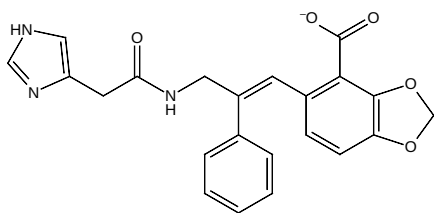

title: AVX62778\_0\_2  
FE: None  
DGb: None  
dDGb: 0.0  
DEb: None  
DGr: None  
IP: 0.2  
LEDGF Binder: None

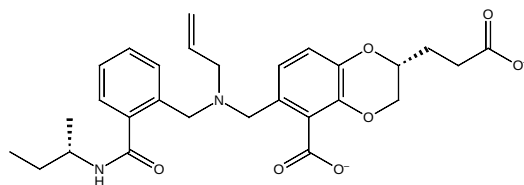

title: AVX38779\_7\_1  
FE: None  
DGb: None  
dDGb: 0.0  
DEb: None  
DGr: None  
IP: 0.5  
LEDGF Binder: None

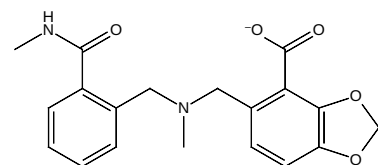

title: AVX38705\_0\_1  
FE: None  
DGb: None  
dDGb: 0.0  
DEb: None  
DGr: None  
IP: 0.5  
LEDGF Binder: None

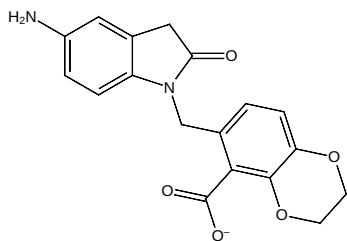

title: AVX40872\_0\_1  
FE: None  
DGb: None  
dDGb: 0.0  
DEb: None  
DGr: None  
IP: 0.0  
LEDGF Binder: None

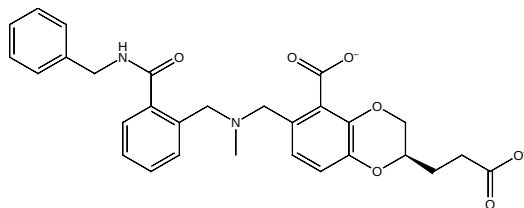

title: AVX38785\_3\_1  
FE: None  
DGb: None  
dDGb: 0.0  
DEb: None  
DGr: None  
IP: 0.5  
LEDGF Binder: None

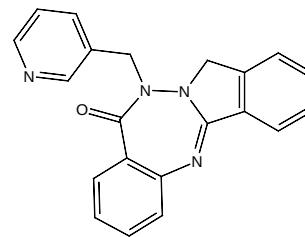

title: AVX40816\_0\_1  
FE: None  
DGb: None  
dDGb: 0.0  
DEb: None  
DGr: None  
IP: 0.1  
LEDGF Binder: None

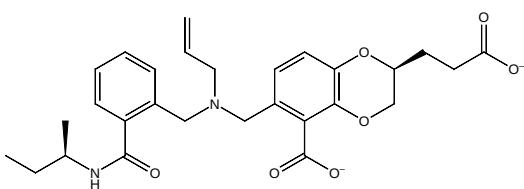

title: AVX38779\_2\_1  
FE: None  
DGb: None  
dDGb: 0.0  
DEb: None  
DGr: None  
IP: 0.5  
LEDGF Binder: None

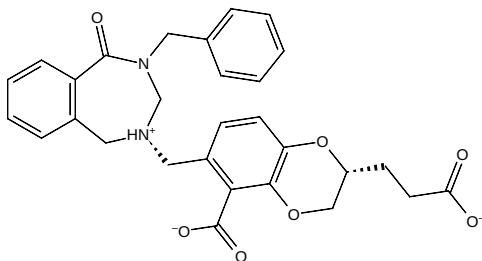

title: AVX38741\_2  
FE: None  
DGb: None  
dDGb: 0.0  
DEb: None  
DGr: None  
IP: 1.5  
LEDGF Binder: None

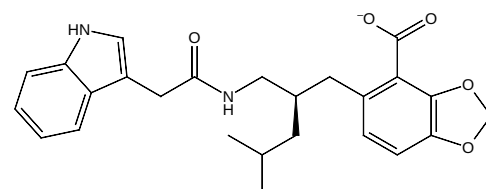

title: AVX40812\_1  
FE: None  
DGb: None  
dDGb: 0.0  
DEb: None  
DGr: None  
IP: 0.0  
LEDGF Binder: None

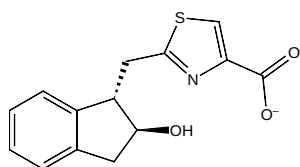

title: AVX17482\_1  
FE: None  
DGb: None  
dDGb: 0.0  
DEb: None  
DGr: None  
IP: 0.0  
LEDGF Binder: None

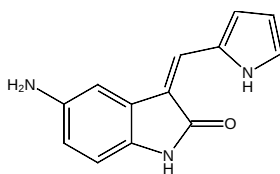

title: AVX62526\_0\_1  
FE: None  
DGb: None  
dDGb: 0.0  
DEb: None  
DGr: None  
IP: 0.0  
LEDGF Binder: None

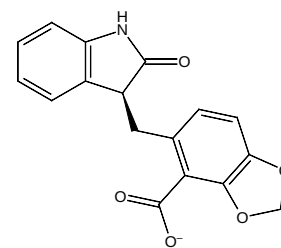

title: AVX17260\_0  
FE: None  
DGb: None  
dDGb: 0.0  
DEb: None  
DGr: None  
IP: 0.0  
LEDGF Binder: 1

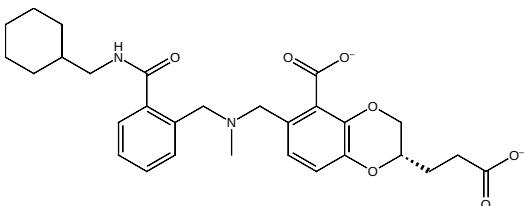

title: AVX38787\_1\_1  
FE: None  
DGb: None  
dDGB: 0.0  
DEb: None  
DGr: None  
IP: 0.5  
LEDGF Binder: None

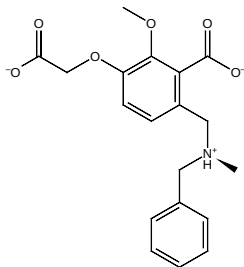

title: AVX40915\_0  
FE: None  
DGb: None  
dDGB: 0.0  
DEb: None  
DGr: None  
IP: 0.2  
LEDGF Binder: None

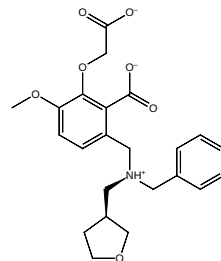

title: AVX101139\_1  
FE: None  
DGb: None  
dDGB: 0.0  
DEb: None  
DGr: None  
IP: 0.2  
LEDGF Binder: None

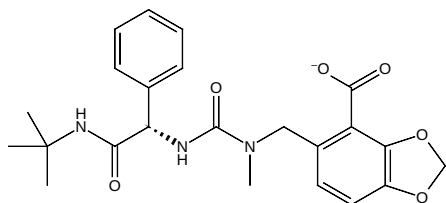

title: AVX38672\_1  
FE: None  
DGb: None  
dDGB: 0.0  
DEb: None  
DGr: None  
IP: 0.0  
LEDGF Binder: None

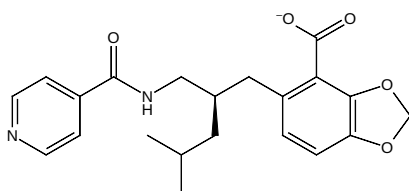

title: GL5243104\_1  
FE: None  
DGb: None  
dDGB: 0.0  
DEb: None  
DGr: None  
IP: 0.0  
LEDGF Binder: None

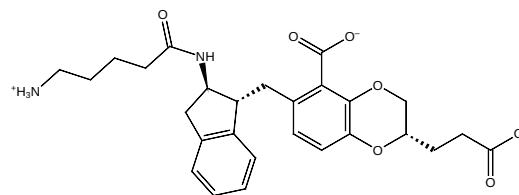

title: AVX38748\_1  
FE: None  
DGb: None  
dDGB: 0.0  
DEb: None  
DGr: None  
IP: 0.0  
LEDGF Binder: None

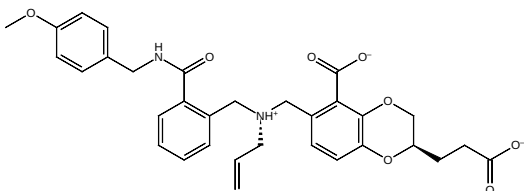

title: AVX38780\_2  
FE: None  
DGb: None  
dDGB: 0.0  
DEb: None  
DGr: None  
IP: 0.3  
LEDGF Binder: None

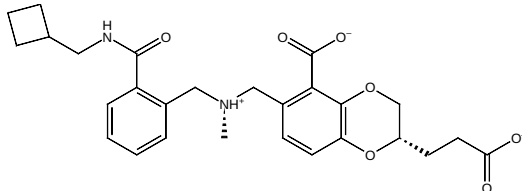

title: AVX38788\_1  
FE: None  
DGb: None  
dDGB: 0.0  
DEb: None  
DGr: None  
IP: 0.3  
LEDGF Binder: 1

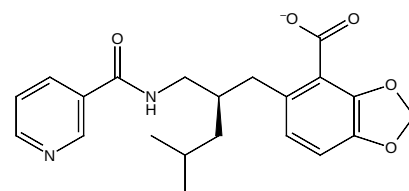

title: AVX40811\_1  
FE: None  
DGb: None  
dDGB: 0.0  
DEb: None  
DGr: None  
IP: 0.0  
LEDGF Binder: None

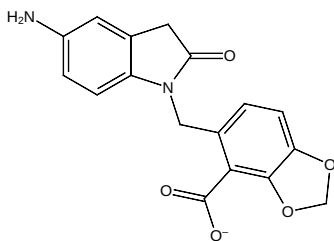

title: AVX40869\_0\_1  
FE: None  
DGb: None  
dDGb: 0.0  
DEb: None  
DGr: None  
IP: 0.0  
LEDGF Binder: None

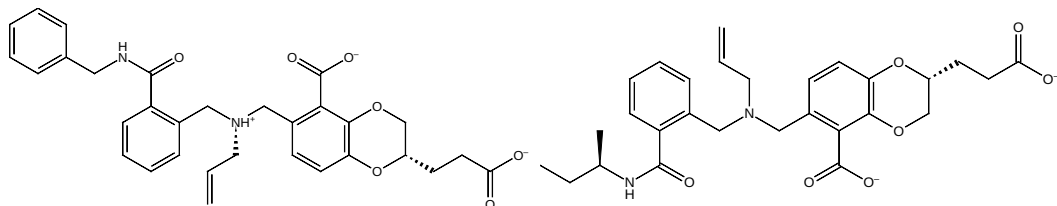

title: AVX38753\_1  
FE: None  
DGb: None  
dDGb: 0.0  
DEb: None  
DGr: None  
IP: 0.3  
LEDGF Binder: None

title: AVX38779\_4\_1  
FE: None  
DGb: None  
dDGb: 0.0  
DEb: None  
DGr: None  
IP: 0.5  
LEDGF Binder: None

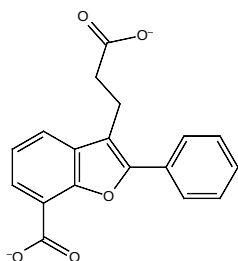

title: AVX38719\_0  
FE: None  
DGb: None  
dDGb: 0.0  
DEb: None  
DGr: None  
IP: 0.0  
LEDGF Binder: None

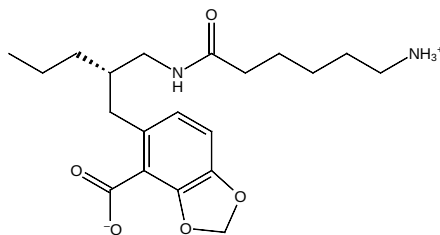

title: AVX17680\_0  
FE: None  
DGb: None  
dDGb: 0.0  
DEb: None  
DGr: None  
IP: 0.0  
LEDGF Binder: 1

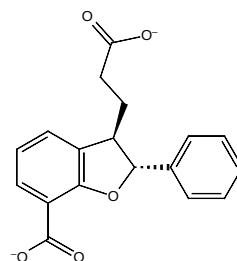

title: AVX38711\_1  
FE: None  
DGb: None  
dDGb: 0.0  
DEb: None  
DGr: None  
IP: 0.0  
LEDGF Binder: None

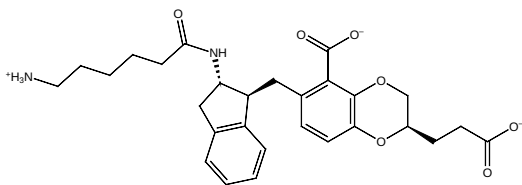

title: AVX38747\_6  
FE: None  
DGb: None  
dDGb: 0.0  
DEb: None  
DGr: None  
IP: 0.0  
LEDGF Binder: None

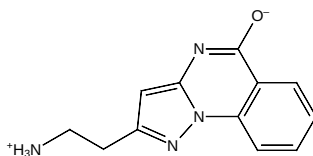

title: AVX17266\_0\_1  
FE: None  
DGb: None  
dDGb: 0.0  
DEb: None  
DGr: None  
IP: 0.0  
LEDGF Binder: None

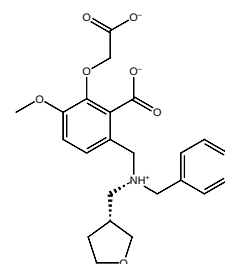

title: AVX101139\_2  
FE: None  
DGb: None  
dDGb: 0.0  
DEb: None  
DGr: None  
IP: 0.2  
LEDGF Binder: None

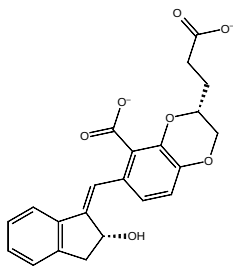

title: AVX38743\_2  
FE: None  
DGb: None  
dDGb: 0.0  
DEb: None  
DGr: None  
IP: 0.0  
LEDGF Binder: None

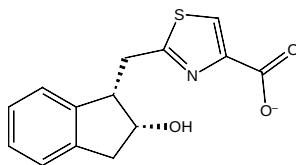

title: AVX17482\_0  
FE: None  
DGb: None  
dDGb: 0.0  
DEb: None  
DGr: None  
IP: 0.0  
LEDGF Binder: None

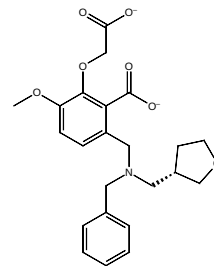

title: AVX101139\_0\_1  
FE: None  
DGb: None  
dDGb: 0.0  
DEb: None  
DGr: None  
IP: 0.7  
LEDGF Binder: None

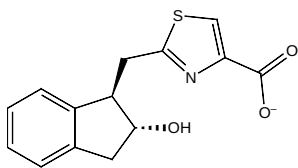

title: AVX17482\_2  
FE: None  
DGb: None  
dDGb: 0.0  
DEb: None  
DGr: None  
IP: 0.0  
LEDGF Binder: None

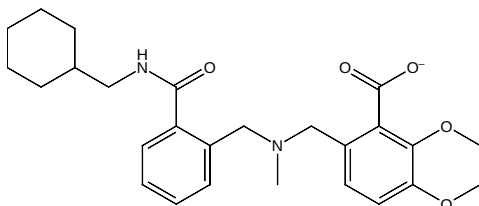

title: AVX101118\_1\_1  
FE: None  
DGb: None  
dDGb: 0.0  
DEb: None  
DGr: None  
IP: 0.5  
LEDGF Binder: None

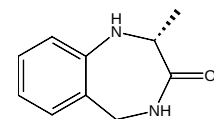

title: AVX17261\_1\_1  
FE: None  
DGb: None  
dDGb: 0.0  
DEb: None  
DGr: None  
IP: 0.0  
LEDGF Binder: None

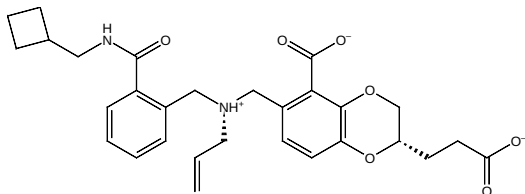

title: AVX38782\_1  
FE: None  
DGb: None  
dDGb: 0.0  
DEb: None  
DGr: None  
IP: 0.3  
LEDGF Binder: 1

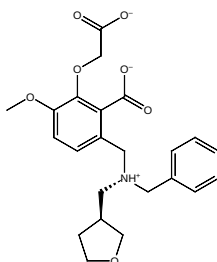

title: AVX101139\_0  
FE: None  
DGb: None  
dDGb: 0.0  
DEb: None  
DGr: None  
IP: 0.2  
LEDGF Binder: None

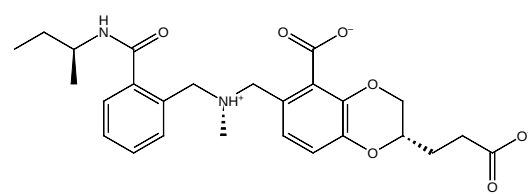

title: AVX38784\_1  
FE: None  
DGb: None  
dDGb: 0.0  
DEb: None  
DGr: None  
IP: 0.3  
LEDGF Binder: None

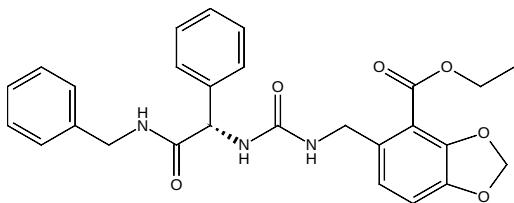

title: AVX17629\_1  
FE: None  
DGb: None  
dDGb: 0.0  
DEb: None  
DGr: None  
IP: 0.0  
LEDGF Binder: None

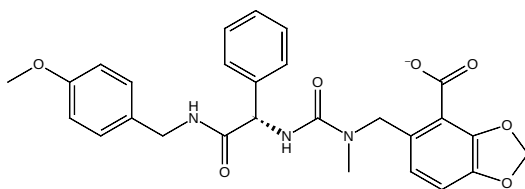

title: AVX38670\_0  
FE: None  
DGb: None  
dDGb: 0.0  
DEb: None  
DGr: None  
IP: 0.0  
LEDGF Binder: None

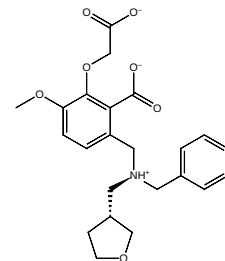

title: AVX101139\_3  
FE: None  
DGb: None  
dDGb: 0.0  
DEb: None  
DGr: None  
IP: 0.2  
LEDGF Binder: None

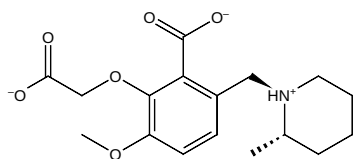

title: AVX40916\_1  
FE: None  
DGb: None  
dDGb: 0.0  
DEb: None  
DGr: None  
IP: 0.0  
LEDGF Binder: None

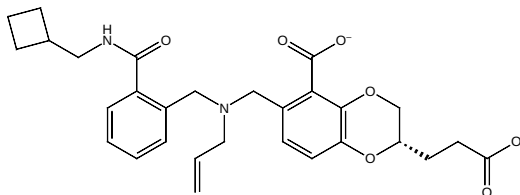

title: AVX38782\_1\_1  
FE: None  
DGb: None  
dDGb: 0.0  
DEb: None  
DGr: None  
IP: 0.5  
LEDGF Binder: None

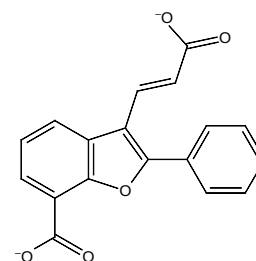

title: AVX38791\_0  
FE: None  
DGb: None  
dDGb: 0.0  
DEb: None  
DGr: None  
IP: 0.0  
LEDGF Binder: None

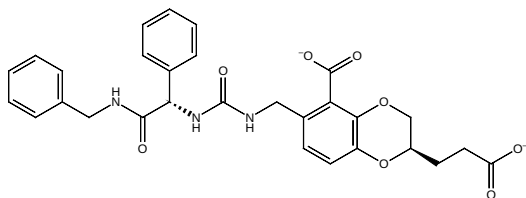

title: AVX17734\_2  
FE: None  
DGb: None  
dDGb: 0.0  
DEb: None  
DGr: None  
IP: 0.0  
LEDGF Binder: None

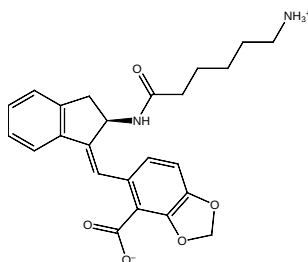

title: AVX101124\_2  
FE: None  
DGb: None  
dDGb: 0.0  
DEb: None  
DGr: None  
IP: 0.0  
LEDGF Binder: None

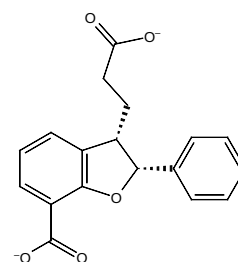

title: AVX38711\_0  
FE: None  
DGb: None  
dDGb: 0.0  
DEb: None  
DGr: None  
IP: 0.0  
LEDGF Binder: None



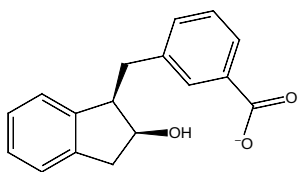

title: AVX17369\_3  
FE: None  
DGb: None  
dDGb: 0.0  
DEb: None  
DGr: None  
IP: 0.0  
LEDGF Binder: None

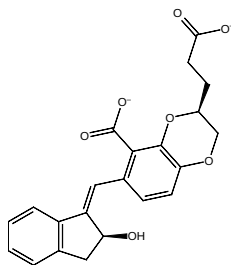

title: AVX38743\_4  
FE: None  
DGb: None  
dDGb: 0.0  
DEb: None  
DGr: None  
IP: 0.0  
LEDGF Binder: None

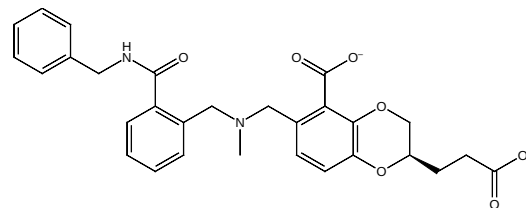

title: AVX38785\_2\_1  
FE: None  
DGb: None  
dDGb: 0.0  
DEb: None  
DGr: None  
IP: 0.5  
LEDGF Binder: None

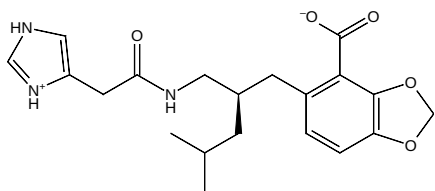

title: GL5243102\_1\_1  
FE: None  
DGb: None  
dDGb: 0.0  
DEb: None  
DGr: None  
IP: 1.4  
LEDGF Binder: None

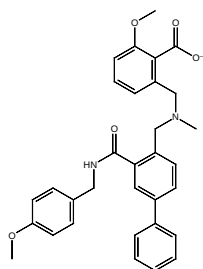

title: AVX101120\_0\_1  
FE: None  
DGb: None  
dDGb: 0.0  
DEb: None  
DGr: None  
IP: 0.5  
LEDGF Binder: None

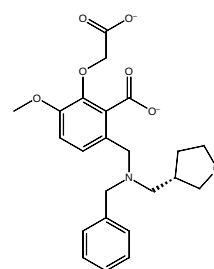

title: AVX101139\_1\_1  
FE: None  
DGb: None  
dDGb: 0.0  
DEb: None  
DGr: None  
IP: 0.7  
LEDGF Binder: None

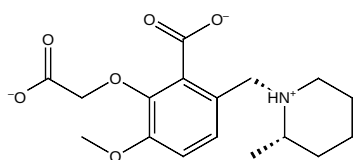

title: AVX40916\_0  
FE: None  
DGb: None  
dDGb: 0.0  
DEb: None  
DGr: None  
IP: 0.0  
LEDGF Binder: None

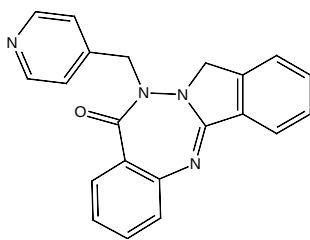

title: AVX40813\_0\_1  
FE: None  
DGb: None  
dDGb: 0.0  
DEb: None  
DGr: None  
IP: 0.1  
LEDGF Binder: None

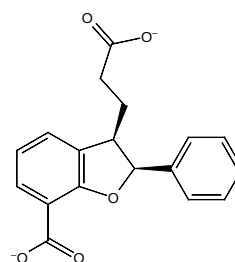

title: AVX38711\_3  
FE: None  
DGb: None  
dDGb: 0.0  
DEb: None  
DGr: None  
IP: 0.0  
LEDGF Binder: None

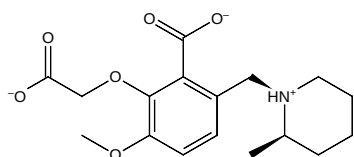

title: AVX40916\_3  
FE: None  
DGb: None  
dDGb: 0.0  
DEb: None  
DGr: None  
IP: 0.0  
LEDGF Binder: None

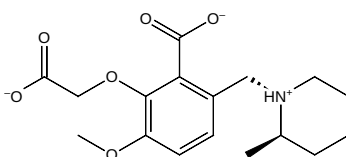

title: AVX40916\_2  
FE: None  
DGb: None  
dDGb: 0.0  
DEb: None  
DGr: None  
IP: 0.0  
LEDGF Binder: None

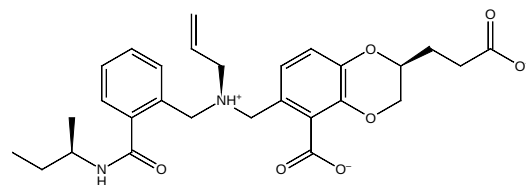

title: AVX38779\_0  
FE: None  
DGb: None  
dDGb: 0.0  
DEb: None  
DGr: None  
IP: 0.3  
LEDGF Binder: None

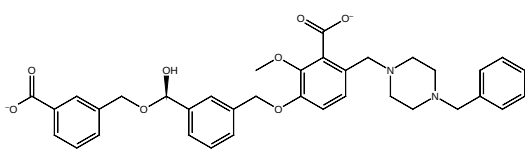

title: AVX40989\_1\_1  
FE: None  
DGb: None  
dDGb: 0.0  
DEb: None  
DGr: None  
IP: 1.0  
LEDGF Binder: None

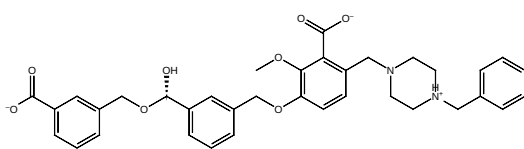

title: AVX40989\_0  
FE: None  
DGb: None  
dDGb: 0.0  
DEb: None  
DGr: None  
IP: 0.4  
LEDGF Binder: None

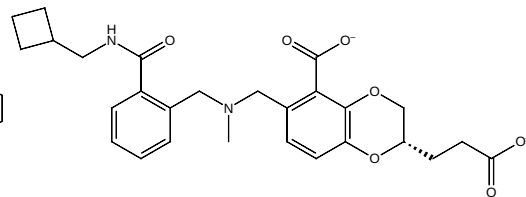

title: AVX38788\_1\_1  
FE: None  
DGb: None  
dDGb: 0.0  
DEb: None  
DGr: None  
IP: 0.5  
LEDGF Binder: None

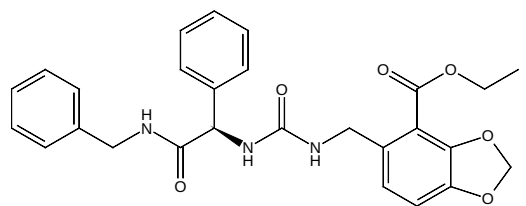

title: AVX17629\_0  
FE: None  
DGb: None  
dDGb: 0.0  
DEb: None  
DGr: None  
IP: 0.0  
LEDGF Binder: None

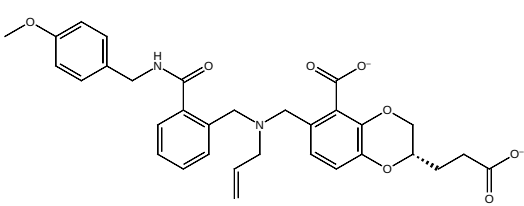

title: AVX38780\_1\_1  
FE: None  
DGb: None  
dDGb: 0.0  
DEb: None  
DGr: None  
IP: 0.5  
LEDGF Binder: None

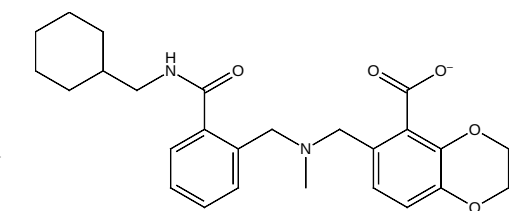

title: AVX101118\_0\_1  
FE: None  
DGb: None  
dDGb: 0.0  
DEb: None  
DGr: None  
IP: 0.5  
LEDGF Binder: None

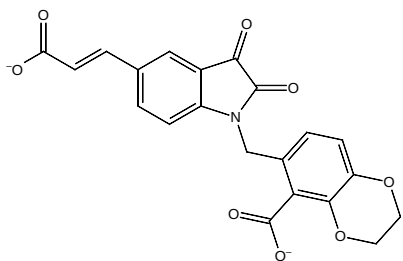

title: AVX101178\_0  
FE: None  
DGb: None  
dDGb: 0.0  
DEb: None  
DGr: None  
IP: 0.0  
LEDGF Binder: None

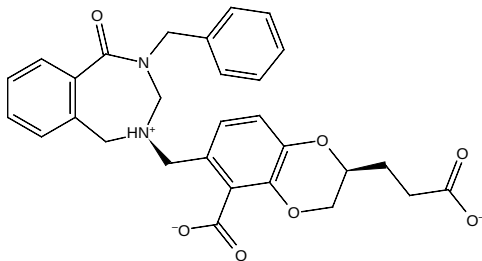

title: AVX38741\_1  
FE: None  
DGb: None  
dDGb: 0.0  
DEb: None  
DGr: None  
IP: 1.5  
LEDGF Binder: None



title: AVX38779\_3\_1  
FE: None  
DGb: None  
dDGb: 0.0  
DEb: None  
DGr: None  
IP: 0.5  
LEDGF Binder: None

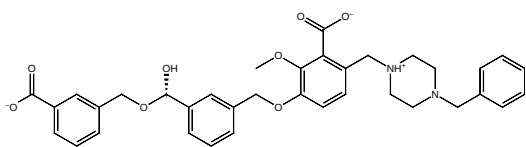

title: AVX40989\_0\_2  
FE: None  
DGb: None  
dDGb: 0.0  
DEb: None  
DGr: None  
IP: 0.3  
LEDGF Binder: None

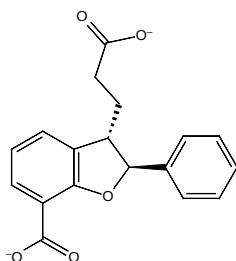

title: AVX38711\_2  
FE: None  
DGb: None  
dDGb: 0.0  
DEb: None  
DGr: None  
IP: 0.0  
LEDGF Binder: None

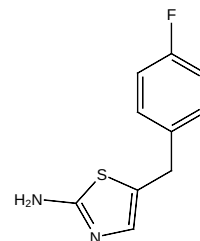

title: AVX17479\_0\_1  
FE: None  
DGb: None  
dDGb: 0.0  
DEb: None  
DGr: None  
IP: 0.0  
LEDGF Binder: None

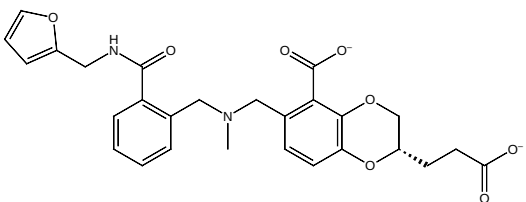

title: AVX38789\_0\_1  
FE: None  
DGb: None  
dDGb: 0.0  
DEb: None  
DGr: None  
IP: 0.5  
LEDGF Binder: None

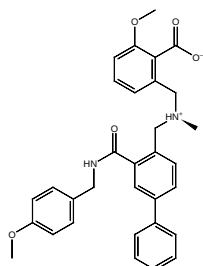

title: AVX101120\_1  
FE: None  
DGb: None  
dDGb: 0.0  
DEb: None  
DGr: None  
IP: 0.3  
LEDGF Binder: None

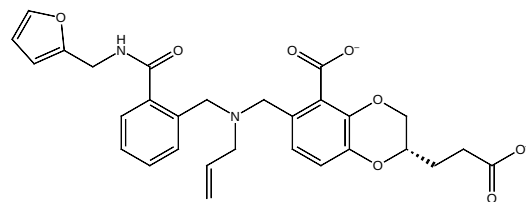

title: AVX38783\_0\_1  
FE: None  
DGb: None  
dDGb: 0.0  
DEb: None  
DGr: None  
IP: 0.5  
LEDGF Binder: None

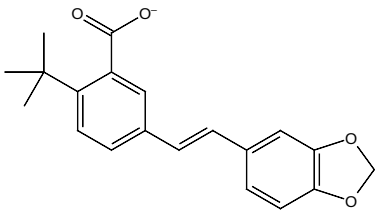

title: AVX40909\_0  
FE: None  
DGb: None  
dDGb: 0.0  
DEb: None  
DGr: None  
IP: 0.0  
LEDGF Binder: None

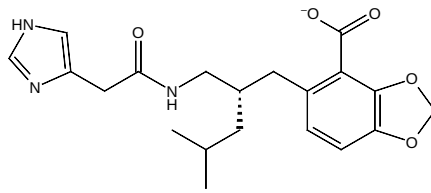

title: GL5243102\_0  
FE: None  
DGb: None  
dDGb: 0.0  
DEb: None  
DGr: None  
IP: 0.2  
LEDGF Binder: None

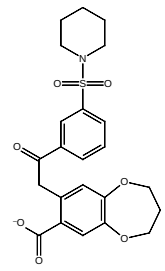

title: AVX16757\_0  
FE: None  
DGb: None  
dDGb: 0.0  
DEb: None  
DGr: None  
IP: 0.0  
LEDGF Binder: None

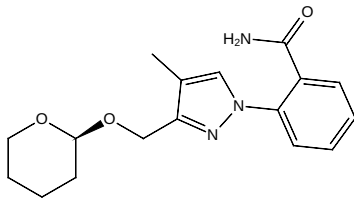

title: AVX17384\_1  
FE: None  
DGb: None  
dDGb: 0.0  
DEb: None  
DGr: None  
IP: 0.0  
LEDGF Binder: None

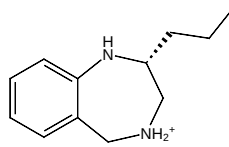

title: AVX17264\_0\_2  
FE: None  
DGb: None  
dDGb: 0.0  
DEb: None  
DGr: None  
IP: 0.0  
LEDGF Binder: None

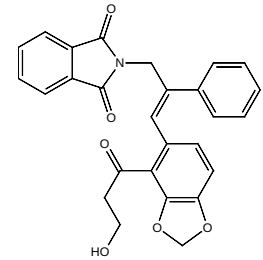

title: AVX62772\_0  
FE: None  
DGb: None  
dDGb: 0.0  
DEb: None  
DGr: None  
IP: 0.0  
LEDGF Binder: None

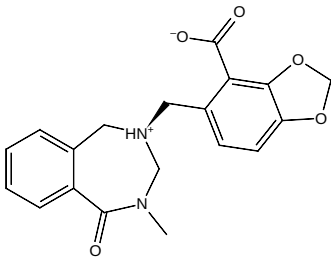

title: AVX17685\_1  
FE: None  
DGb: None  
dDGb: 0.0  
DEb: None  
DGr: None  
IP: 1.4  
LEDGF Binder: None

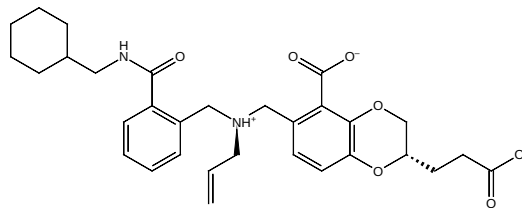

title: AVX38781\_0  
FE: None  
DGb: None  
dDGb: 0.0  
DEb: None  
DGr: None  
IP: 0.3  
LEDGF Binder: None

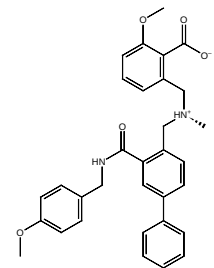

title: AVX101120\_0  
FE: None  
DGb: None  
dDGb: 0.0  
DEb: None  
DGr: None  
IP: 0.3  
LEDGF Binder: None

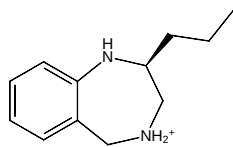

title: AVX17264\_1\_2  
FE: None  
DGb: None  
dDGb: 0.0  
DEb: None  
DGr: None  
IP: 0.0  
LEDGF Binder: None

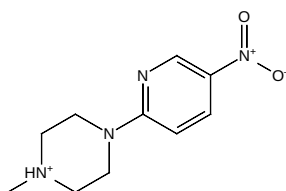

title: AVX17228\_0\_1  
FE: None  
DGb: None  
dDGb: 0.0  
DEb: None  
DGr: None  
IP: 0.1  
LEDGF Binder: None

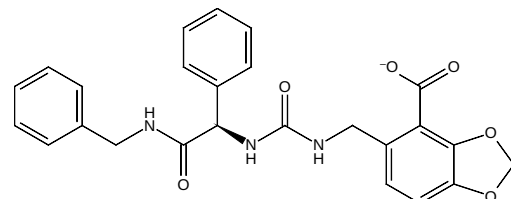

title: AVX17628\_0  
FE: None  
DGb: None  
dDGb: 0.0  
DEb: None  
DGr: None  
IP: 0.0  
LEDGF Binder: None

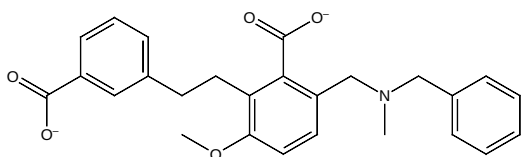

title: AVX40944\_1\_1  
FE: None  
DGb: None  
dDGb: 0.0  
DEb: None  
DGr: None  
IP: 0.8  
LEDGF Binder: None

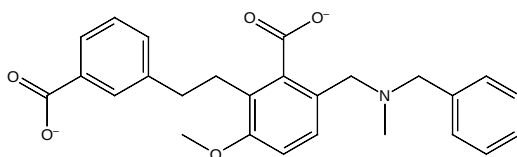

title: AVX40944\_0\_1  
FE: None  
DGb: None  
dDGb: 0.0  
DEb: None  
DGr: None  
IP: 0.8  
LEDGF Binder: None

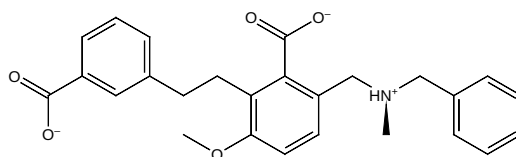

title: AVX40944\_1  
FE: None  
DGb: None  
dDGb: 0.0  
DEb: None  
DGr: None  
IP: 0.2  
LEDGF Binder: None

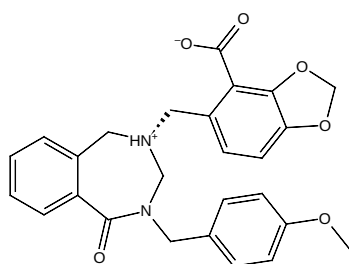

title: AVX17687\_0  
FE: None  
DGb: None  
dDGb: 0.0  
DEb: None  
DGr: None  
IP: 1.5  
LEDGF Binder: None

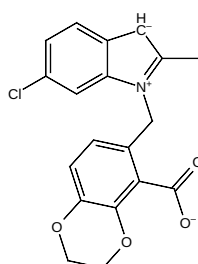

title: AVX40871\_0\_2  
FE: None  
DGb: None  
dDGb: 0.0  
DEb: None  
DGr: None  
IP: 0.0  
LEDGF Binder: None

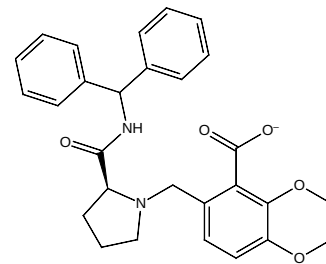

title: AVX62808\_1\_1  
FE: None  
DGb: None  
dDGb: 0.0  
DEb: None  
DGr: None  
IP: 1.2  
LEDGF Binder: None

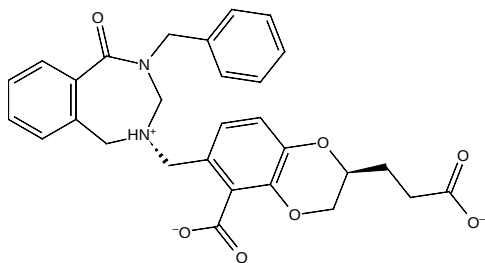

title: AVX38741\_0  
FE: None  
DGb: None  
dDGb: 0.0  
DEb: None  
DGr: None  
IP: 1.5  
LEDGF Binder: None

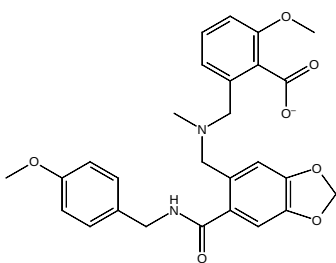

title: AVX101119\_1\_1  
FE: None  
DGb: None  
dDGb: 0.0  
DEb: None  
DGr: None  
IP: 0.6  
LEDGF Binder: None

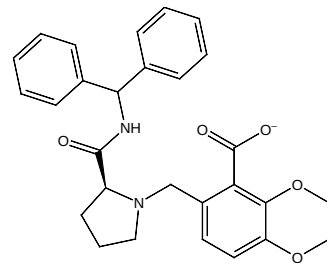

title: AVX62808\_0\_1  
FE: None  
DGb: None  
dDGb: 0.0  
DEb: None  
DGr: None  
IP: 1.2  
LEDGF Binder: None

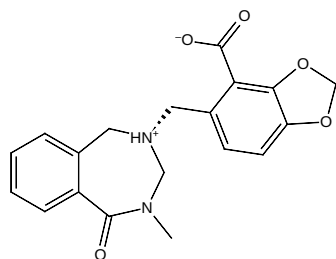

title: AVX17685\_0  
FE: None  
DGb: None  
dDGb: 0.0  
DEb: None  
DGr: None  
IP: 1.4  
LEDGF Binder: None

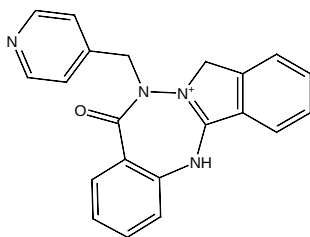

title: AVX40813\_0  
FE: None  
DGb: None  
dDGb: 0.0  
DEb: None  
DGr: None  
IP: 1.3  
LEDGF Binder: None

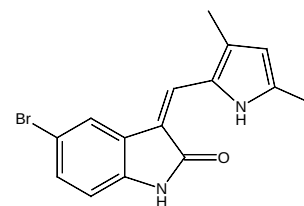

title: AVX62530\_0  
FE: None  
DGb: None  
dDGb: 0.0  
DEb: None  
DGr: None  
IP: 0.0  
LEDGF Binder: None

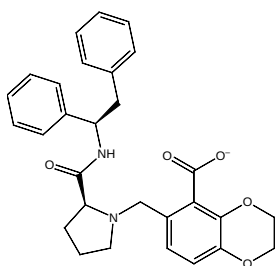

title: AVX62807\_3\_1  
FE: None  
DGb: None  
dDGb: 0.0  
DEb: None  
DGr: None  
IP: 1.2  
LEDGF Binder: None

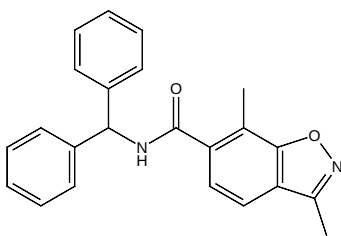

title: AVX38709\_0  
FE: None  
DGb: None  
dDGb: 0.0  
DEb: None  
DGr: None  
IP: 0.0  
LEDGF Binder: None

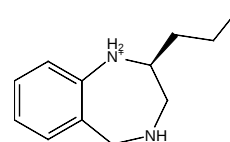

title: AVX17264\_1  
FE: None  
DGb: None  
dDGb: 0.0  
DEb: None  
DGr: None  
IP: 0.2  
LEDGF Binder: None

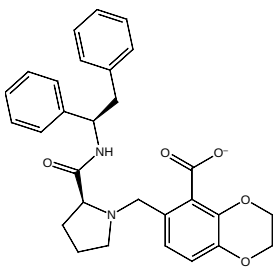

title: AVX62807\_2\_1  
FE: None  
DGb: None  
dDGb: 0.0  
DEb: None  
DGr: None  
IP: 1.2  
LEDGF Binder: None

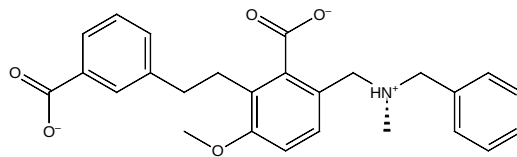

title: AVX40944\_0  
FE: None  
DGb: None  
dDGb: 0.0  
DEb: None  
DGr: None  
IP: 0.2  
LEDGF Binder: None

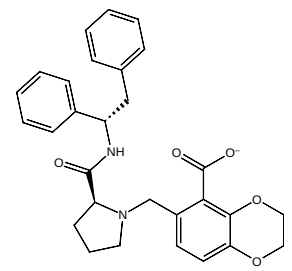

title: AVX62807\_1\_1  
FE: None  
DGb: None  
dDGb: 0.0  
DEb: None  
DGr: None  
IP: 1.2  
LEDGF Binder: None

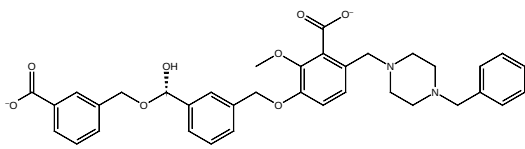

title: AVX40989\_0\_1  
FE: None  
DGb: None  
dDGb: 0.0  
DEb: None  
DGr: None  
IP: 1.0  
LEDGF Binder: None

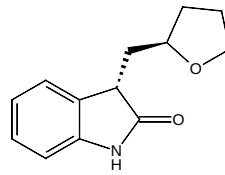

title: AVX62525\_2  
FE: None  
DGb: None  
dDGb: 0.0  
DEb: None  
DGr: None  
IP: 0.0  
LEDGF Binder: None

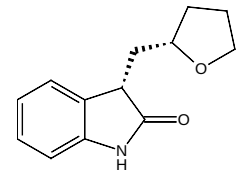

title: AVX62525\_0  
FE: None  
DGb: None  
dDGb: 0.0  
DEb: None  
DGr: None  
IP: 0.0  
LEDGF Binder: None

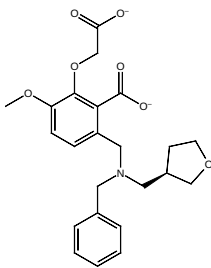

title: AVX101139\_3\_1  
FE: None  
DGb: None  
dDGb: 0.0  
DEb: None  
DGr: None  
IP: 0.7  
LEDGF Binder: None

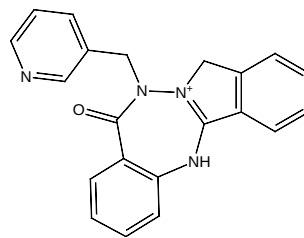

title: AVX40816\_0  
FE: None  
DGb: None  
dDGb: 0.0  
DEb: None  
DGr: None  
IP: 1.3  
LEDGF Binder: None

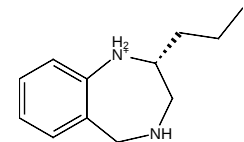

title: AVX17264\_0  
FE: None  
DGb: None  
dDGb: 0.0  
DEb: None  
DGr: None  
IP: 0.2  
LEDGF Binder: None

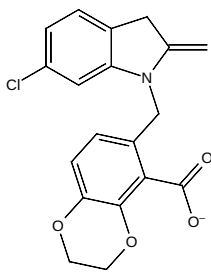

title: AVX40871\_0  
FE: None  
DGb: None  
dDGb: 0.0  
DEb: None  
DGr: None  
IP: 1.9  
LEDGF Binder: None

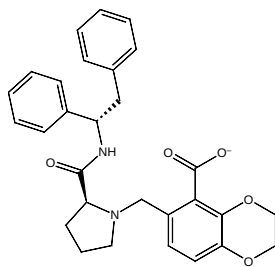

title: AVX62807\_0\_1  
FE: None  
DGb: None  
dDGb: 0.0  
DEb: None  
DGr: None  
IP: 1.2  
LEDGF Binder: None

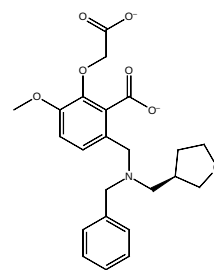

title: AVX101139\_2\_1  
FE: None  
DGb: None  
dDGb: 0.0  
DEb: None  
DGr: None  
IP: 0.7  
LEDGF Binder: None

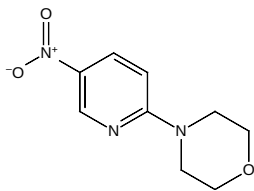

title: AVX17231\_0\_1  
FE: None  
DGb: None  
dDGb: 0.0  
DEb: None  
DGr: None  
IP: 0.0  
LEDGF Binder: None

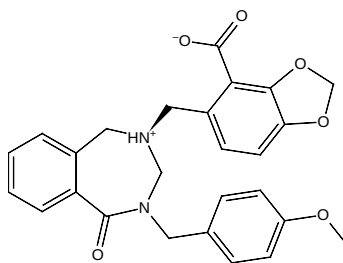

title: AVX17687\_1  
FE: None  
DGb: None  
dDGb: 0.0  
DEb: None  
DGr: None  
IP: 1.5  
LEDGF Binder: None

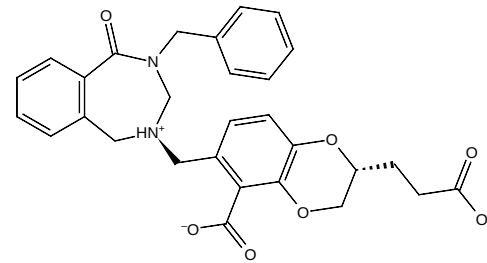

title: AVX38741\_3  
FE: None  
DGb: None  
dDGb: 0.0  
DEb: None  
DGr: None  
IP: 1.5  
LEDGF Binder: None

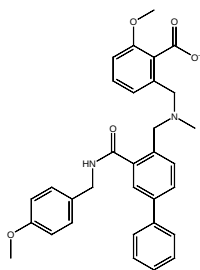

title: AVX101120\_1\_1  
FE: None  
DGb: None  
dDGb: 0.0  
DEb: None  
DGr: None  
IP: 0.5  
LEDGF Binder: None

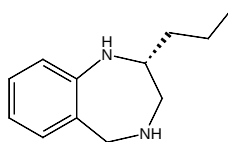

title: AVX17264\_0\_1  
FE: None  
DGb: None  
dDGb: 0.0  
DEb: None  
DGr: None  
IP: 2.7  
LEDGF Binder: None

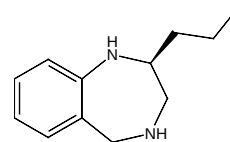

title: AVX17264\_1\_1  
FE: None  
DGb: None  
dDGb: 0.0  
DEb: None  
DGr: None  
IP: 2.7  
LEDGF Binder: None



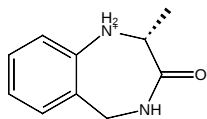

title: AVX17261\_1  
FE: None  
DGb: None  
dDGb: 0.0  
DEb: None  
DGr: None  
IP: 2.5  
LEDGF Binder: None

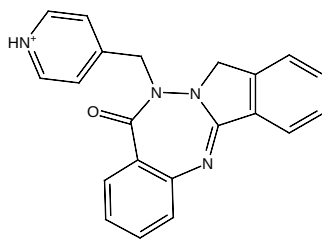

title: AVX40813\_0\_2  
FE: None  
DGb: None  
dDGb: 0.0  
DEb: None  
DGr: None  
IP: 2.3  
LEDGF Binder: None

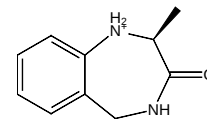

title: AVX17261\_0  
FE: None  
DGb: None  
dDGb: 0.0  
DEb: None  
DGr: None  
IP: 2.5  
LEDGF Binder: None

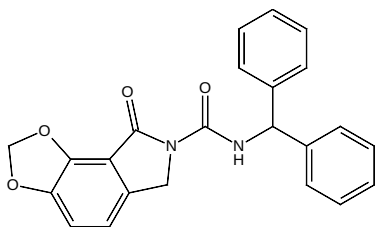

title: AVX17552\_0  
FE: None  
DGb: None  
dDGb: 0.0  
DEb: None  
DGr: None  
IP: 0.0  
LEDGF Binder: None

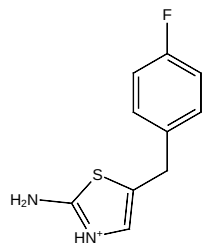

title: AVX17479\_0  
FE: None  
DGb: None  
dDGb: 0.0  
DEb: None  
DGr: None  
IP: 3.4  
LEDGF Binder: None

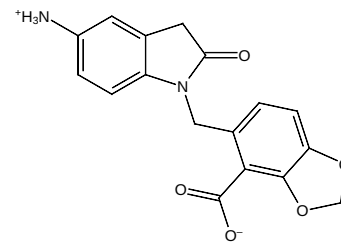

title: AVX40869\_0  
FE: None  
DGb: None  
dDGb: 0.0  
DEb: None  
DGr: None  
IP: 3.3  
LEDGF Binder: None

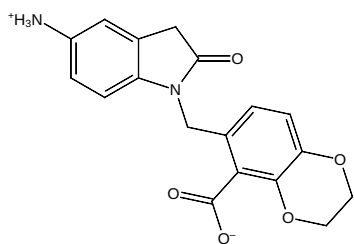

title: AVX40872\_0  
FE: None  
DGb: None  
dDGb: 0.0  
DEb: None  
DGr: None  
IP: 3.3  
LEDGF Binder: None

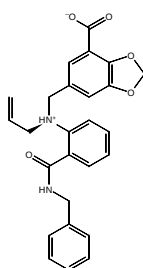

title: AVX38752\_1  
FE: None  
DGb: None  
dDGb: 0.0  
DEb: None  
DGr: None  
IP: 4.8  
LEDGF Binder: None

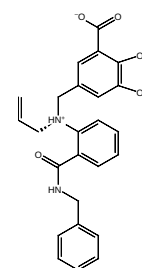

title: AVX38752\_0  
FE: None  
DGb: None  
dDGb: 0.0  
DEb: None  
DGr: None  
IP: 4.8  
LEDGF Binder: None

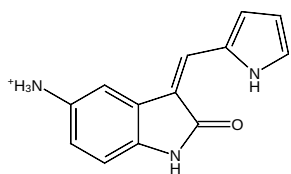

title: AVX62526\_0  
FE: None  
DGb: None  
dDGb: 0.0  
DEb: None  
DGr: None  
IP: 4.7  
LEDGF Binder: None

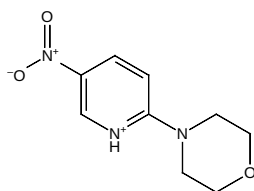

title: AVX17231\_0  
FE: None  
DGb: None  
dDGb: 0.0  
DEb: None  
DGr: None  
IP: 4.9  
LEDGF Binder: None

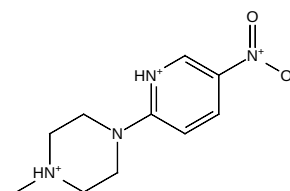

title: AVX17228\_0  
FE: None  
DGb: None  
dDGb: 0.0  
DEb: None  
DGr: None  
IP: 7.9  
LEDGF Binder: None

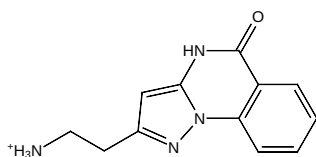

title: AVX17266\_0  
FE: None  
DGb: None  
dDGb: 0.0  
DEb: None  
DGr: None  
IP: 10.2  
LEDGF Binder: None
